# Supplementary material for: A genetic, genomic, and computational resource for exploring neural circuit function
Source: eLife journal article supplement (doi:10.7554/elife.50901), 2020-01-15

FIGURE 5 - Supplemental 1

A. TAPIN-seq profiles modeled as weighted sum of optic lobe scRNA-seq clusters

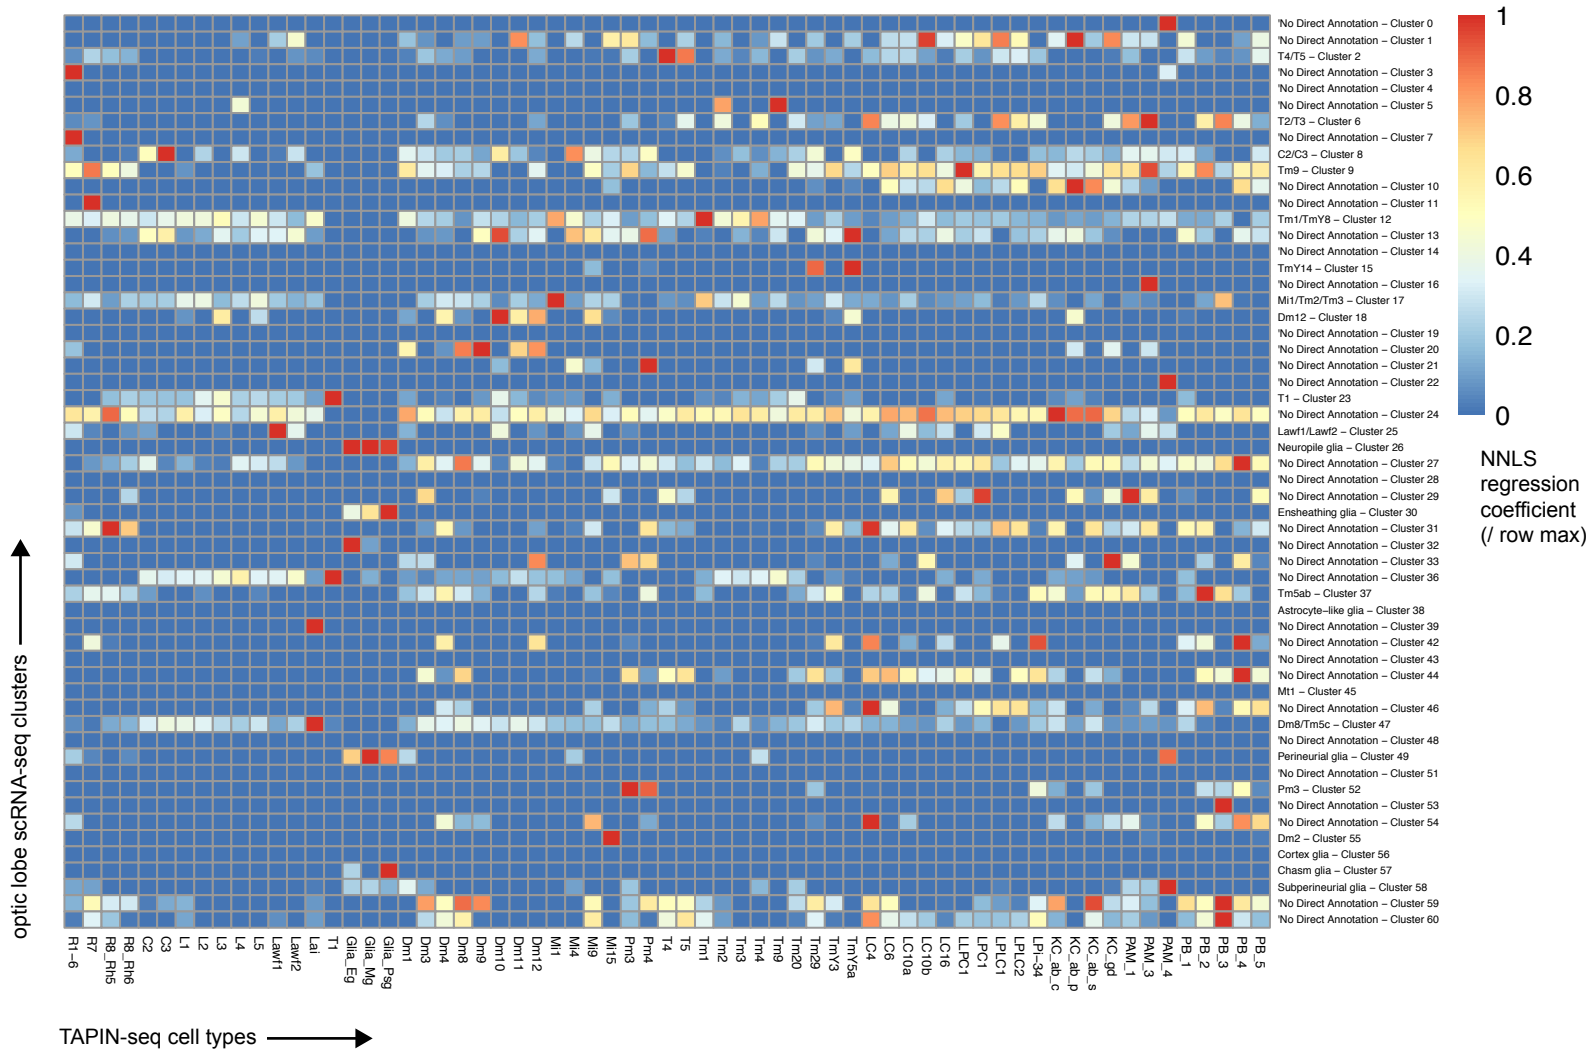

Supplement: supp [file elife-50901-supp-v1.zip]
