# Supplementary material for: A genetic, genomic, and computational resource for exploring neural circuit function
Source: eLife journal article supplement (doi:10.7554/elife.50901), 2020-01-15

FIGURE 2 - Supplemental 2

A. TAPIN-seq expression of top-10 cell type-enriched genes identified by FACS-seq (Konstantinides et al., 2018)

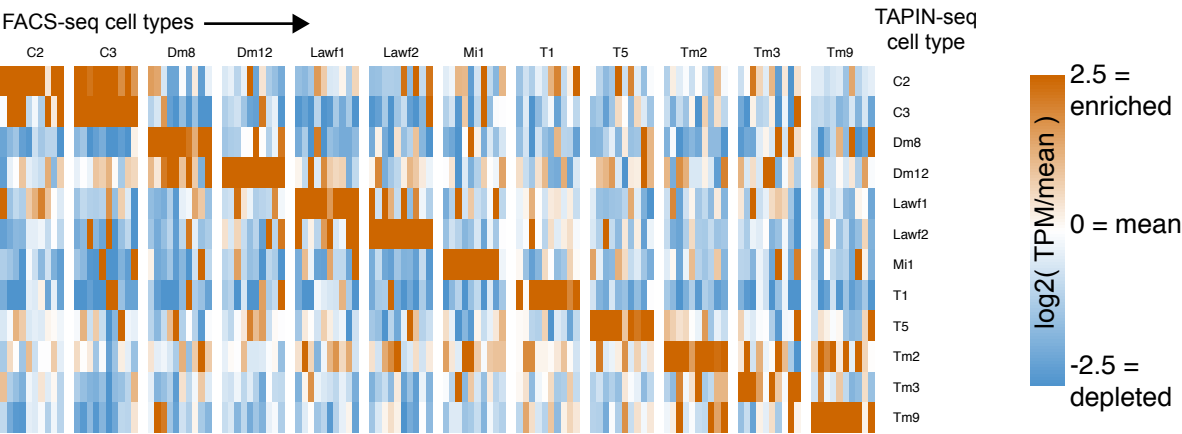

B. Similarity of cell type-enriched genes identified by TAPIN-seq vs FACS-seq (Konstantinides et al., 2018)

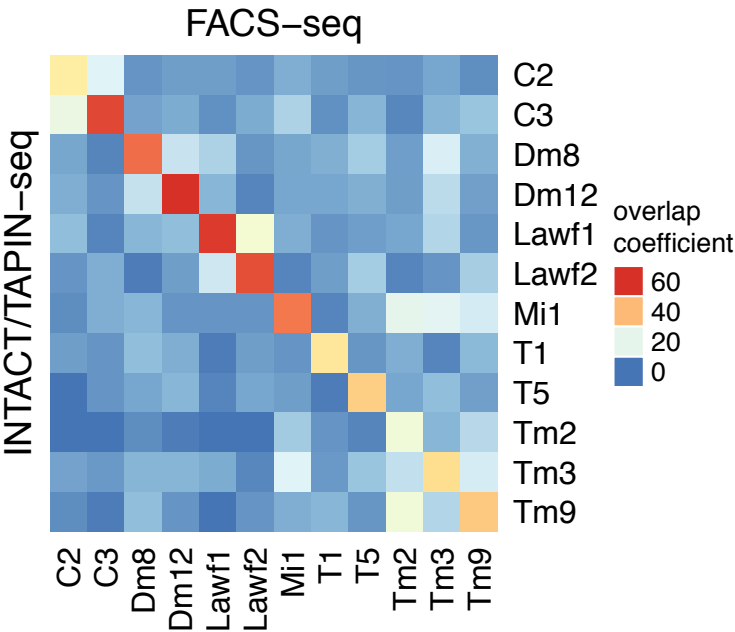

Supplement: supp [file elife-50901-supp-v1.zip]
