# Supplementary material for: A genetic, genomic, and computational resource for exploring neural circuit function
Source: eLife journal article supplement (doi:10.7554/elife.50901), 2020-01-15

**FIGURE 4 - Supplemental 1**

**A. Cell adhesion molecules**  
sparse cell adhesion molecules

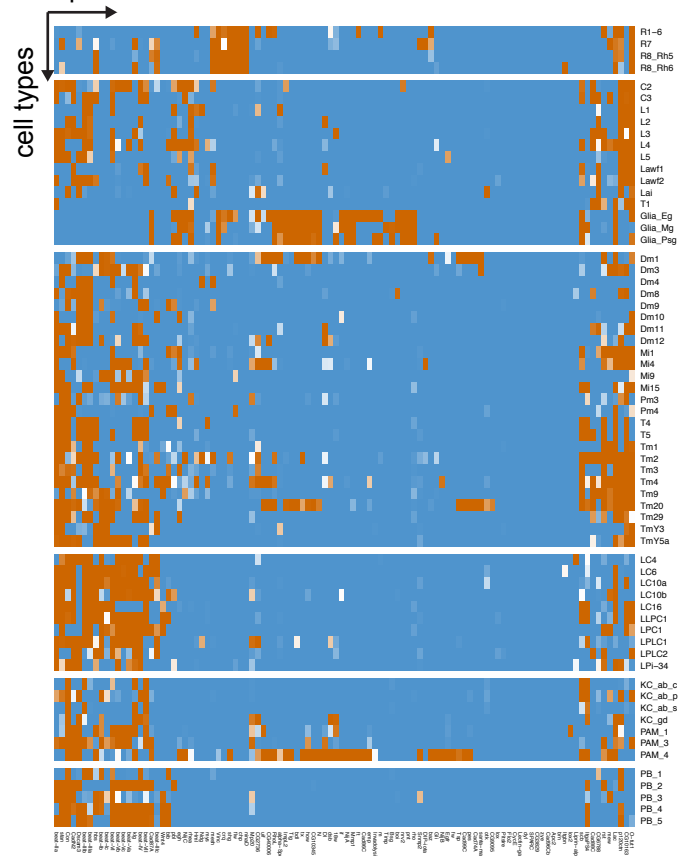

**E. Interacting extracellular proteins**  
Cell type 1

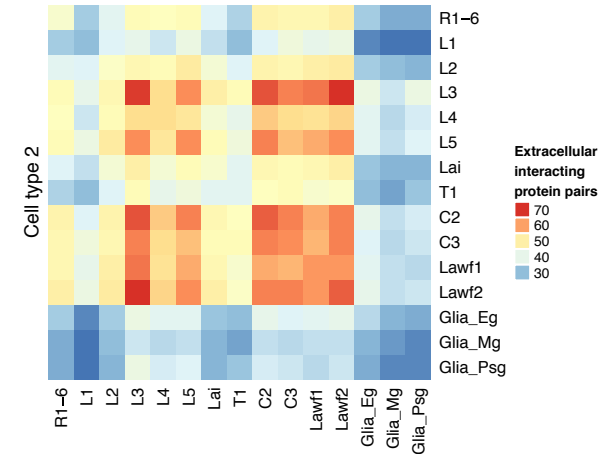

**F. Laminar connectivity (Rivera-Alba 2011)**  
Post-synaptic cell

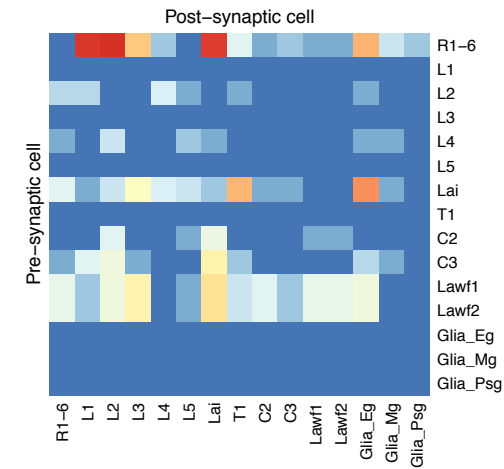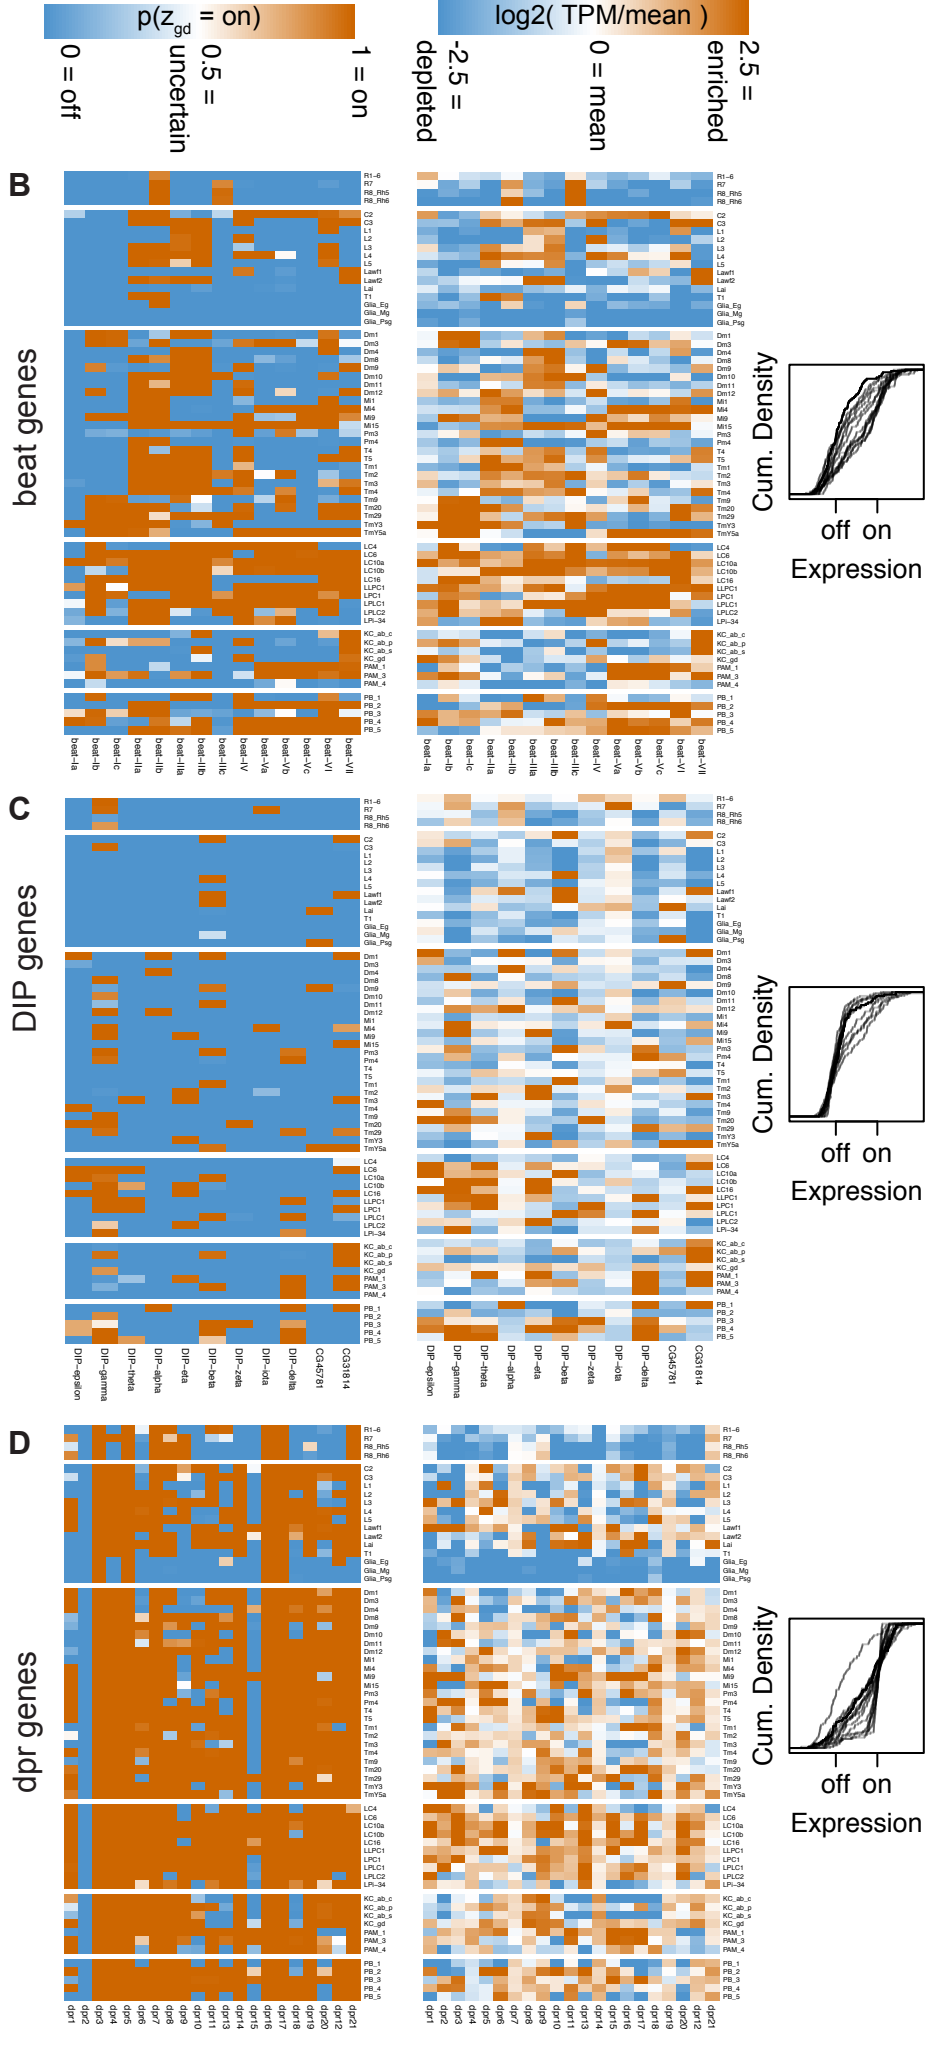

Supplement: supp [file elife-50901-supp-v1.zip]
