# Supplementary material for: A genetic, genomic, and computational resource for exploring neural circuit function
Source: eLife journal article supplement (doi:10.7554/elife.50901), 2020-01-15
Supplement: supp [file elife_poa_e50901_Supplementary_file_1.xlsx]

## Sheet: TableS1_all_drivers
driverID	driverType	driverID.external	celltype	celltype.details	celltype.additional.expression	how.identified	split.AD.or.Genotype	split.DBD	driver.reference
C2_d1	anatomy-defined	SS00778	C2	C2	a few weakly labeled central brain (CB) cells	See driver reference	R20C11-p65ADZp_attP40	R25B02-ZpGDBD_attP2	Tuthill et al 2013
C2.C3_d1	comboCellTypes	SS00779	C2.C3	C2,C3		See driver reference	R20C11-p65ADZp_attP40	R48D11-ZpGDBD_attP2	Tuthill et al 2013
C3_d1	pureCellType	SS00688	C3	C3		See driver reference	R26H02-p65ADZp_attP40	R29G11-ZpGDBD_attP2	Tuthill et al 2013
CCAP_d1	broad	BL-25686	CCAP	Putative CCAP expressing cells ( promoter fusion)		NA	P{CCAP-GAL4.P}9	NA	Park et al 2003
ChAT_d1	broad	BL-60317	ChAT	Putative ChaT expressing cells (Protein trap)		NA	w[*]; Mi{Trojan-GAL4.0}ChAT[MI04508-TG4.0]/TM6B, Tb[1]		Diao et al 2015
Crz_d1	broad	BL-51977	Crz	Putative Crz expressing cells ( promoter fusion)		NA	P{Crz-GAL4.391}4M	NA	Tayler et al 2012
Dm1_d1	pureCellType	SS00309	Dm1	Dm1	retinal pigment cells (based on expression data)	Cell type description: Nern et al 2015	R28D04-p65ADZp_attP40	R72E04-ZpGDBD_attP2	This study
Dm10_d1	pureCellType	SS00327	Dm10	Dm10	a few weakly labeled CB and accessory medulla cells	Cell type description: Nern et al 2015	R65H03-p65ADZp_attP40	R71D01-ZpGDBD_attP2	This study
Dm11_d1	pureCellType	SS03159	Dm11	Dm11	some Dm8 cells ; weak expression in a few other optic lobe ( OL) and CB cells	Cell type description: Nern et al 2015	VT043162-p65ADZp_attP40	R15C01-ZpGDBD_attP2	This study
Dm12_d1	pureCellType	SS00384	Dm12	Dm12		Cell type description: Nern et al 2015	R84F02-p65ADZp_attP40	R87B02-ZpGDBD_attP2	This study
Dm3_d1	pureCellType	SS00974	Dm3	Dm3	very weak expression in a few L2 cells	Cell type description: Nern et al 2015, Fischbach and Dititrich 1989	R73F07-p65ADZpattP40	R31B08-ZpGDBD_attP2	This study
Dm4_d1	pureCellType	SS02361	Dm4	Dm4	a few CB cells	Cell type description: Nern et al 2015, Fischbach and Dititrich 1989	R53D12-p65ADZp_attP40	R70B10-ZpGDBD_attP2	This study
Dm4_d2	pureCellType	SS02592	Dm4	Dm4		Cell type description: Nern et al 2015, Fischbach and Dititrich 1989	R12C04-p65ADZp_attP40	R75H07-ZpGDBD_attP2	This study
Dm8_d1	pureCellType	SS00323	Dm8	Dm8	a few CB cells	Cell type description: Nern et al 2015, Fischbach and Dititrich 1989	R55F02-p65ADZp_attP40	R24F06-ZpGDBD_attP2	This study
Dm9_d1	pureCellType	SS02427	Dm9	Dm9		Cell type description: Nern et al 2015, Fischbach and Dititrich 1989	R19G04-p65ADZp_attP40	VT017422-ZpGDBD_attP2	This study
Dsk_d1	broad	BL-51981	Dsk	Putative Dsk expressing cells ( promoter fusion)		NA	w[1118]; P{w[+mC]=Dsk-GAL4.TH}3M	NA	Asahina and Anderson (2013), Personal communication to FlyBase FBrf0222772
Gad1_d1	broad	BL-60324	Gad1	Putative Gad1 expressing cells (protein trap)		NA	w*; Mi{Trojan-lexA:QFAD.2}Gad1MI09277-TlexA:QFAD.2/TM6B, Tb1	NA	Diao et al 2015
Glia_Eg_d1	pureCellType	SS55439	Glia_Eg	Eg	mg, ocellar photoreceptor neurons	Cell type description: Edwards et al 2012	R37D04-p65ADZp_attP40	R55A03-ZpGdbd_attP2	This study
Glia_Eg_d2	pureCellType	SS55438	Glia_Eg	Eg	mg, ocellar photoreceptor neurons	Cell type description: Edwards et al 2012	R37D04-p65ADZp_attP40	R42B05-ZpGdbd_attP2	This study
Glia_Eg_d3	pureCellType	SS08909	Glia_Eg	Eg	mg, ocellar photoreceptor neurons	Cell type description: Edwards et al 2012	R42B05-p65ADZp_attP40	R55A03-ZpGdbd_attP2	This study
Glia_Mg_d1	pureCellType	SS55437	Glia_Mg	Mg		Cell type description: Edwards et al 2012	R35E04-p65ADZp_attP40	R65B12-ZpGdbd__attP2	This study
Glia_Psg_d1	pureCellType	SS55440	Glia_Psg	Psg		Cell type description: Edwards et al 2012	R38A07-p65ADZp_attP40	R87B09-ZpGdbd_attP2	This study
Glia_Psg_d2	pureCellType	SS55441	Glia_Psg	Psg		Cell type description: Edwards et al 2012	R42B05-p65ADZp_attP40	R87B09-ZpGdbd_attP2	This study
Ilp2_d1	broad	BL-37516	Ilp2	Putative Ilp2 expressing cells ( promoter fusion)		NA	P{Ilp2-GAL4.R}2	NA	Rulifson et al 2002
KC_ab_c_d1	pureCellType	MB594B	KC_ab_c	KC Î±/Î²c		See driver reference	R13F02-p65ADZp_attP40	R58F02-ZpGDBD_attP2	Aso et al 2014
KC_ab_c.p.s_d1	comboCellTypes	MB008B	KC_ab_c.p.s	KC Î±/Î²c, KC Î±/Î²p, KC Î±/Î²s		See driver reference	R13F02-p65ADZp_attP40	R44E04-ZpGDBD_attP2	Aso et al 2014
KC_ab_p_d1	pureCellType	MB371B	KC_ab_p	KC Î±/Î²p		See driver reference	R13F02-p65ADZp_attP40	R85D07-ZpGDBD_attP2	Aso et al 2014
KC_ab_s_d1	pureCellType	MB185B	KC_ab_s	KC Î±/Î²s		See driver reference	R52H09-p65ADZp_attP40	R18F09-ZpGDBD_attP2	Aso et al 2014
KC_apbp_ap_d1	pureCellType	MB463B	KC_apbp_ap	KC Î±'/Î²'ap		See driver reference	R35B12-p65ADZp_attP40	R34A03-ZpGDBD_attP2	Aso et al 2014
KC_apbp_m_d1	pureCellType	MB418B	KC_apbp_m	KC Î±'/Î²'m		See driver reference	R26E07-p65ADZp_attP40	R30F02-ZpGDBD_attP2	Aso et al 2014
KC_gd_d1	pureCellType	MB419B	KC_gd	KC Î³d	a few OL and CB cells	See driver reference	R26E07-p65ADZp_ attP40	R39A11-ZpGdbd in attP2	Aso et al 2014
KC_gd_d2	pureCellType	MB607B	KC_gd	KC Î³d		See driver reference	R19B03-p65ADZp_attP40	R39A11-ZpGDBD_attP2	Aso et al 2014
Kdm2_d1	broad	BL-30819	Kdm2	Putative Kdm2 expressing cells ( enhancer trap)		NA	w[*]; P{w[+mW.hs]=GawB}Kdm2[36Y]	NA	Taghert et al 2001
L1_d1	pureCellType	SS00693	L1	L1		See driver reference	R66A01-p65ADZp_attP40	R48A08-ZpGDBD_attP2	Tuthill et al 2013
L1_d2	pureCellType	SS00691	L1	L1		Cell type description: Tuthill et al 2013,Fischbach and Dittrich 1989	R48A08-p65ADZp_attP40	R66A01-ZpGDBD_attP2	This study
L1.L2_d1	comboCellTypes	SS00806	L1.L2	L1,L2		See driver reference	R75H09-p65ADZp_attP40	R29G11-ZpGDBD_attP2	Tuthill et al 2013
L1.L2_d2	comboCellTypes	SS00797	L1.L2	L1,L2		See driver reference	R48A08-p65ADZp_attP40	R29G11-ZpGDBD_attP2	Tuthill et al 2013
L1L2_aFLAG_beads	control	NA	NA	NA	NA	NA	NA	NA	NA
L2_d1	pureCellType	SS00801	L2	L2		See driver reference	R53G02-p65ADZp_attP40	R29G11-ZpGDBD_attP2	Tuthill et al 2013
L3_d1	pureCellType	SS00696	L3	L3		See driver reference	R64B03-p65ADZp_attP40	R14B07-ZpGDBD_attP2	Tuthill et al 2013
L4_d1	pureCellType	SS00789	L4	L4		See driver reference	R31C06-p65ADZp_Su(Hw)attP2	R34G07-ZpGDBD_attP2	Tuthill et al 2013
L5_d1	pureCellType	SS00692	L5	L5	a few CB cells	See driver reference	R64B07-p65ADZp_attP40	R37E10-ZpGDBD_attP2	Tuthill et al 2013
Lai_d1	pureCellType	SS55442	Lai	Lai		Cell type description: Tuthill et al 2013,Fischbach and Dittrich 1989	R54D12-p65ADZp_attP40	R92A10-ZpGDBD_attP2	This study
lamina_d1	dissected	(SS55439)	lamina	dissected tissue from flies expressing unc84-2xGFP in the Glia_Eg_d1 pattern		NA	NA	NA	dissected tissue
lamina_d2	dissected	(SS00796)	lamina	dissected tissue from flies expressing unc84-2xGFP in the Tm1_d1 pattern		NA	NA	NA	dissected tissue
Lat_d1	pureCellType	SS00657	Lat	Lat		Cell type description: Tuthill et al 2013,Fischbach and Dittrich 1989	R23E12-p65ADZp_attP40	R55B04-ZpGDBD_attP2	Dionne et al in preparation
Lawf1_d1	pureCellType	SS00800	Lawf1	Lawf1		See driver reference	R52H01-p65ADZp_attP40	R17C11-ZpGDBD_attP2	Tuthill et al 2013
Lawf1_d2	pureCellType	SS00689	Lawf1	Lawf1		Cell type description: Tuthill et al 2013,Fischbach and Dittrich 1989	R11G01-p65ADZp_attP40	R15G08-ZpGDBD_attP2	This study
Lawf2_d1	pureCellType	SS00698	Lawf2	Lawf2		See driver reference	R11D03-p65ADZp_attP40	R19C10-ZpGDBD_attP2	Tuthill et al 2013
LC10a_d1	pureCellType	OL0019B	LC10a	LC10a		See driver reference	R35D04-p65ADZp_attP40	R22D06-ZpGDBD_attP2	Wu et al 2016
LC10b_d1	pureCellType	SS03723	LC10b	LC10b	a few LC10c cells	Cell type description: Wu et al 2016	VT000848-p65ADZp_attP40	VT019742-ZpGDBD_attP2	This study
LC10bc_d1	pureCellType	SS00940	LC10bc	LC10bc		See driver reference	R35D04-p65ADZp_attP40	R22A07-ZpGDBD_attP2	Wu et al 2016
LC10d_d1	pureCellType	SS03822	LC10d	LC10d		See driver reference	VT043920-p65ADZp_attP40	R91B01-ZpGDBD_attP2	Wu et al 2016
LC16_d1	pureCellType	OL0046B	LC16	LC16		See driver reference	R26A03-p65ADZp_attP40	R54A05-ZpGDBD_attP2	Wu et al 2016
LC16_d2	pureCellType	OL0092C	LC16	LC16	a few LC11 cells	See driver reference	R92B02-p65ADZp_VK00027	R38E08-ZpGDBD_attP2	Wu et al 2016
LC4_d1	pureCellType	SS00766	LC4	LC4	a few cells in the dorsal CB	See driver reference	R49C04-p65ADZp_attP40	R72E01-ZpGDBD_attP2	von Reyn et al 2017
LC6_d1	pureCellType	OL0070B	LC6	LC6	a few LC10 and CB	See driver reference	R91B01-p65ADZp_attP40_	R22A07-ZpGDBD_attP2	Wu et al 2016
LC6_d2	pureCellType	OL0218B	LC6	LC6	a few LC16 and CB	See driver reference	R47E07-p65ADZp_attP40	VT049344-ZpGDBD_attP2	Wu et al 2016
lLNv_d1	pureCellType	SS00645	lLNv	lLNv		Cell type description: Helfrich-Förster et al 2007	R61G12-p65ADZp_attP40	R10H10-ZpGDBD_attP2	a gift from Heather Dionne, Rubin lab
LLPC1_d1	pureCellType	SS02437	LLPC1	LLPC1		Columnar lobula plate VPN related to LPC1 but with a lobula branch (lo layer LO4). Main lobula plate arbors in layers LP1 and LP3. Tentatively named LLPC1. Similar to Lccn2 (Fischbach and Dittrich 1989) and LPLC3 (Panser et al 2016).	VT048351-p65ADZp_attP40	VT057342-ZpGDBD_attP2	This study
LPC1_d1	pureCellType	SS02575	LPC1	LPC1	very few CB cells (these appear different from cells in LPC1_d2)	Cell type description: Wu et al 2016; Panser et al 2016	R81A05-p65ADZp_attP40	VT031495-ZpGDBD_attP2	This study
LPC1_d2	pureCellType	SS02700	LPC1	LPC1	weak expression in some OL and CB cells	Cell type description: Wu et al 2016; Panser et al 2016	R81A05-p65ADZp_attP40	VT043014-ZpGDBD_attP2	This study
LPi-34_d1	pureCellType	SS03656	LPi-34	LPi-34		Cell type description: Maus et al 2015	VT061221-p65ADZp_attP40	VT045575-ZpGDBD_attP2	This study
LPLC1_d1	pureCellType	OL0029B	LPLC1	LPLC1		See driver reference	R64G09-p65ADZp_attP40	R37H04-ZpGDBD_attP2	Wu et al 2016
LPLC2_d1	pureCellType	OL0048B	LPLC2	LPLC2		See driver reference	R19G02-p65ADZp_attP40	R75G12-ZpGDBD_attP2	Wu et al 2016
LPTC_HS.VS_d1	pureCellType	SS04438	LPTC_HS.VS	LPTC HS,VS		Cell type description: Fischbach and Dittrich 1989	VT058487-p65ADZp_attP40	R35G07-ZpGDBD_attP2	This study
MBON_bp1_d1	pureCellType	MB057B	MBON_bp1	MBON-Î²'1		See driver reference	R80G12-p65ADZp_attP40	R53H03-ZpGDBD_attP2	Aso et al 2014
MBON_g1pedc_d1	pureCellType	MB112C	MBON_g1pedc	MBON-Î³1pedc>Î±/Î²		See driver reference	R93D10-p65ADZp_VK00027	13F04-ZpGdbd in attP2	Aso et al 2014
Mi1_d1	pureCellType	SS00809	Mi1	Mi1	a few CB cells	See driver reference	R19F01-p65ADZp_attP40	R71D01-ZpGDBD_attP2	Strother et al 2017
Mi15_d1	pureCellType	SS00321	Mi15	Mi15		Cell type description: Takemura 2013	R53E04-p65ADZp_attP40	R75H08-ZpGDBD_attP2	This study
Mi15_d2	pureCellType	SS02425	Mi15	Mi15		Cell type description: Takemura 2013	R26H07-p65ADZp_attP40	VT010253-ZpGDBD_attP2	This study
Mi4_d1	pureCellType	SS01019	Mi4	Mi4	a few weakly labeled additional cells	See driver reference	R48A07-p65ADZp_attP40	R13F11-ZpGDBD_attP2	Strother et al 2017
Mi9_d1	pureCellType	SS02432	Mi9	Mi9	perhaps a few Mi13 and/or Mi4 cells ( a few Mi13 and one Mi4 cell seen by MCFO)	See driver reference	R48A07-p65ADZp_attP40	VT046779-ZpGDBD_attP2	Strother et al 2017
Mi9_d2	pureCellType	SS02448	Mi9	Mi9	occasional Mi4 cells	See driver reference	VT046779-p65ADZp_attP40	R41C05-ZpGDBD_attP2	Strother et al 2017
mock2	control	NA	NA	NA	NA	NA	NA	NA	NA
Muscles_App_d1	pureCellType	BL-1767	Muscles_App	muscles cells (isolated from appendages)	driver also expressed in some non-muscle cells	Muscle expression of 24B-GAL4 based on literature	P{GawB}how[24B]	NA	Brand and Perrimon, 1993, Sweeney et al 1995
Muscles_Head_d1	pureCellType	BL-1767	Muscles_Head	muscles cells (isolated from heads)	driver also expressed in some non-muscle cells	Muscle expression of 24B-GAL4 based on literature	P{GawB}how[24B]	NA	Brand and Perrimon, 1993, Sweeney et al 1995
Muscles_Head_d2	pureCellType	R10F02	Muscles_Head	muscles cells (isolated from heads)	driver also expressed in some non-muscle cells		R10F02-GAL4 in attP2	NA	Pfeiffer et al 2008
no_driver_aGFP_beads	control	NA	NA	NA	NA	See driver reference	NA	NA	NA
NPF_d1	broad	BL-25681	NPF	Putative NPF expressing cells ( promoter fusion)		NA	y[1] w[*]; P{w[+mC]=NPF-GAL4.1}2	NA	Wu et al 2003
opticlobe_d1	dissected	(SS55439)	opticlobe	dissected tissue from flies expressing unc84-2xGFP in the Glia_Eg_d1 pattern		NA	NA	NA	dissected tissue
opticlobe_d2	dissected	(SS00796)	opticlobe	dissected tissue from flies expressing unc84-2xGFP in the Tm1_d1 pattern		NA	NA	NA	dissected tissue
PAM_1_d1	pureCellType	MB109B	PAM_1	PAM-Î²'2a	Tm1_d1	See driver reference	R76F05-p65ADZp_attP40	R23C12-ZpGDBD_attP2	Aso et al 2014
PAM_2_d1	pureCellType	MB196B	PAM_2	PAM-Î²'2a, PAM-Î³3, PAM-Î³4, PAM-Î³4<Î³1Î³2, PAM-Î³5		See driver reference	R58E02-p65ADZp_attP40	R36B06-ZpGDBD_attP2	Aso et al 2014
PAM_3_d1	pureCellType	MB213B	PAM_3	PAM-Î²1, PAM-Î²2		See driver reference	R76F05-p65ADZp_attP40	R32G08-ZpGDBD_attP2	Aso et al 2014
PAM_4_d1	pureCellType	MB312B	PAM_4	PAM-Î³4, PAM-Î³4<Î³1Î³2		See driver reference	R58E02-p65ADZp_attP40	R10G03-ZpGDBD_attP2	Aso et al 2014
PAM_5_d1	pureCellType	MB315C	PAM_5	PAM-Î³5		See driver reference	R58E02-p65ADZp_attP40	R48H11-ZpGDBD_attP2	Aso et al 2014
PAM_6_d1	pureCellType	MB042B	PAM_6	PAM-Î²'2m, PAM-Î³3, PAM-Î³4, PAM-Î³5		See driver reference	R58E02-p65ADZp_attP40	R22E04-ZpGDBD_attP2	Aso et al 2014
PAM_7_d1	pureCellType	MB043C	PAM_7	PAM-Î±1		See driver reference	R58E02-p65ADZp_attP40_	R32D11-ZpGDBD_attP2	Aso et al 2014
PAM_8_d1	pureCellType	MB441B	PAM_8	PAM-Î³3		See driver reference	R30G08-p65ADZp_attP40	R48B03-ZpGDBD_attP2	Aso et al 2014
PAM_9_d1	pureCellType	MB063B	PAM_9	PAM-Î²1		See driver reference	R93D10-p65ADZp_attP40	R68C09-ZpGDBD_attP2	Aso et al 2014
PB_1_d1	pureCellType	SS00116	PB_1	PB18.s_Gx_7Gy.b__PB18.s-9i1i8c.b		Cell type description: Wolff et al 2015	R24A02-p65ADZp_attP40	R12G01-ZpGDBD_attP2	a gift from Tanya Wolff, Rubin lab
PB_2_d1	pureCellType	SS00090	PB_2	PBG1-8.b-EBw.s-D_Vgall.b		Cell type description: Wolff et al 2015	R19G02-p65ADZp_attP40	R15C03-ZpGDBD_attP2	Wolff and Rubin, 2018
PB_3_d1	pureCellType	SS02268	PB_3	PBG2-9.s-EBt.b-NO1.b	many OL cells including Mi1; also GF cells; OL cells outnumber cells in PB	Cell type description: Wolff et al 2015	R30C01-p65ADZp_attP40	R48A11-ZpGDBD_attP2	a gift from Tanya Wolff, Rubin lab
PB_4_d1	pureCellType	SS02204	PB_4	PBG2-9.s-FBl1.b-NO3P.b		Cell type description: Wolff et al 2015	VT016127-p65ADZp_attP40	R20H05-ZpGDBD_attP2	a gift from Tanya Wolff, Rubin lab
PB_4_d2	pureCellType	SS02302	PB_4	PBG2-9.s-FBl1.b-NO3P.b		Cell type description: Wolff et al 2015	R65B12-p65ADZp_attP40	R12G01-ZpGDBD_attP2	a gift from Tanya Wolff, Rubin lab
PB_5_d1	pureCellType	SS02255	PB_5	PBG2-9.s-FBl2.b-NO3A.b		Cell type description: Wolff et al 2015	R16D01-p65ADZp_attP40	VT016114-ZpGDBD_attP2	Wolff and Rubin, 2018
PB_6_d1	pureCellType	SS00078	PB_6	PBG2-9.s-FBl3.b-NO2D.b		Cell type description: Wolff et al 2015	R16D01-p65ADZp_attP40	R15E01-ZpGDBD_attP2	Wolff and Rubin, 2018
Pdf_d1	broad	BL-6900	Pdf	Putative PDF expressing cells ( promoter fusion)		NA	y[1] w[*]; P{w[+mC]=Pdf-GAL4.P2.4}2	NA	Park et al 2000
Pm3_d1	pureCellType	SS00328	Pm3	Pm3		Cell type description: Nern et al 2015	R70B07-p65ADZp_attP40	R65D05-ZpGDBD_attP2	This study
Pm4_d1	pureCellType	SS00317	Pm4	Pm4	a few unidentified Tm cells	Cell type description: Nern et al 2015	R52B07-p65ADZp_attP40	R53C05-ZpGDBD_attP2	This study
R1-6_d1	pureCellType	ninaEfl-GAL4	R1-6	R1-6		Cell type description: Fischbach and Dittrich 1989	ninaEfl-GAL4 in attP2	NA	a gift from Barret Pfeiffer, Rubin lab
R7_d1	pureCellType	BL-8604	R7	R7: Rh3 expressing , R7: Rh4 expressing	some additional photoreceptor neurons (dorsal rim R8 cells, ocelli, eyelet)	See for review of rhodopsin expression in photorecepto neurons	w*; CyO/wgSp-1; P{Pan-R7-GAL4}3/TM2	NA	Ratnakumar and Desplan 2004; Personal communication to FlyBase FBrf0179876
R7_Rh3_d1	pureCellType	BL-7457	R7_Rh3	R7: Rh3 expressing	some additional photoreceptor neurons (dorsal rim R8 cells)		y1 w*; P{Rh3-GAL4}2	NA	Ratnakumar and Desplan 2003; Personal communication to FlyBase FBrf0173259
R8_Rh5_d1	pureCellType	BL-7458	R8_Rh5	R8: Rh5 expressing	a few extraretinal photoreceptor neurons (eyelet)		y[1] w[*]; P{w[+mC]=Rh5-GAL4}2; TM2/TM6B, Tb[1]	NA	Ratnakumar and Desplan 2003; Personal communication to FlyBase FBrf0173259
R8_Rh6_d1	pureCellType	BL-7464	R8_Rh6	R8: Rh6 expressing	a few extraretinal photoreceptor neurons (eyelet)		w[*]; wg[Sp-1]/CyO; P{w[+mC]=Rh6-GAL4.D}3/TM2	NA	Ratnakumar and Desplan 2003; Personal communication to FlyBase FBrf0173259
T1_d1	pureCellType	SS00790	T1	T1		See driver reference	R31F10-p65ADZp_attP40	R30F10-ZpGDBD_attP2	Tuthill et al 2013
T4_d1	pureCellType	SS02344	T4	T4: strongest in T4b,T4c		Cell type description: Fischbach and Dittrich 1989	VT015785-p65ADZp_attP40	R39H12-ZpGDBD_attP2	This study
T4_d2	pureCellType	SS23866	T4	T4: strongest in T4b,T4c		Cell type description: Fischbach and Dittrich 1989	VT015785-p65ADZp_attP40	R42F06-ZpGDBD_attP2	This study
T4.T5_d1	comboCellTypes	SS00324	T4.T5	T4,T5	a few CB cells	See driver reference	VT055812-p65ADZp_attP40	R42F06-ZpGDBD_attP2	Strother et al 2017
T4.T5_d1_female	comboCellTypes	SS00324	T4.T5	T4,T5	a few CB cells	See driver reference	VT055812-p65ADZp_attP40	R42F06-ZpGDBD_attP2	Strother et al 2017
T4.T5_d1_male	comboCellTypes	SS00324	T4.T5	T4,T5	a few CB cells	See driver reference	VT055812-p65ADZp_attP40	R42F06-ZpGDBD_attP2	Strother et al 2017
T4.T5_d2	comboCellTypes	SS21452	T4.T5	T4,T5		Cell type description: Fischbach and Dittrich 1989	R59E08-p65ADZp_attP40	R42F06-ZpGDBD_attP2	This study
T5_d1	pureCellType	SS25175	T5	T5: strongest in T5c and T5d	some weakly labeled T4 cells	Cell type description: Fischbach and Dittrich 1989	R24A07-p65ADZp_attP40	VT043070-ZpGDBD_attP2	This study
T5_d2	pureCellType	SS23757	T5	T5: mainly T5a and T5b	some weakly labeled T4 cells	Cell type description: Fischbach and Dittrich 1989	VT055812-p65ADZp_attP40	R47H05-ZpGDBD_attP2	This study
Tm1_d1	pureCellType	SS00796	Tm1	Tm1	a few CB cells, some weakly labeled Lawf2 cells	Cell type description: Fischbach and Dittrich 1989	R41G07-p65ADZp_attP40	R74G01-ZpGDBD_attP2	This study
Tm1_d1_capture1	control	NA	NA	NA	NA	NA	NA	NA	NA
Tm1_d1_input	control	NA	NA	NA	NA	NA	NA	NA	NA
Tm1_d1_mock1	control	NA	NA	NA	NA	NA	NA	NA	NA
Tm1_d1_mock2	control	NA	NA	NA	NA	NA	NA	NA	NA
Tm2_d1	pureCellType	SS00811	Tm2	Tm2	some L2 cells, some unidentified Tm cells; a few CB cells	Cell type description: Fischbach and Dittrich 1989	R28D05-p65ADZp_attP40	R82F12-ZpGDBD_attP2	This study
Tm20_d1	pureCellType	SS00355	Tm20	Tm20	some T1 cells; retinal pigment cells ( based on expression data); a pair of strongly labeled cells in the dorsal CB cells	Cell type description:Gao et al 2008, Fischbach and Dittrich 1989	R41E03-p65ADZp_attP40	R81G11-ZpGDBD_attP2	This study
Tm29_d1	pureCellType	SS00308	Tm29	Tm29		Tm cell type with main medulla branches in M6 with collaterals to M3,M4 and M8. Lobula terminal in Lo5B. Multicolumnar. Similar to Tm5b but with more distal medulla branches. Tentatively named Tm29.	R26A08-p65ADZp_attP40	R72G03-ZpGDBD_attP2	This study
Tm3_d1	pureCellType	SS00300	Tm3	Tm3		See driver reference	R13E12-p65ADZp_attP40	R59C10-ZpGDBD_attP2	Strother et al 2017
Tm4_d1	pureCellType	SS00320	Tm4	Tm4		Cell type description: Fischbach and Dittrich 1989	R53C02-p65ADZp_attP40	R60H04-ZpGDBD_attP2	Strother et al 2017
Tm9_d1	pureCellType	SS00307	Tm9	Tm9		Cell type description: Fischbach and Dittrich 1989	R24C08-p65ADZp_attP40	R70B08-ZpGDBD_attP2	This study
TmY3_d1	pureCellType	SS00331	TmY3	TmY3		Cell type description: Fischbach and Dittrich 1989, Takemura et al 2013	R71D01-p65ADZp_attP40	R10C06-ZpGDBD_attP2	This study
TmY5a_d1	pureCellType	SS02594	TmY5a	TmY5a	a few Mi3-like medulla neurons	Cell type description: Fischbach and Dittrich 1989, Takemura et al 2013	R26A02-p65ADZp_attP40	R73C02-ZpGDBD_attP2	This study
VGlut_d1	broad	BL-60312	VGlut	Putative VGlut expressing cells (protein trap)		NA	w[*]; Mi{Trojan-GAL4.2}VGlut[MI04979-TG4.2]/CyO	NA	Diao et al 2015

## Sheet: TableS2_RNAseq_samples
sampleID.internal	sampleName	driverType	qualityControl	simpleCellTypes	driverID	intact.reporter	intact.protocol	yield.nuclei.thousands	yield.cdna.ug
s025	C2_d1_rep2	anatomicalCellType:single	pass	C2	C2_d1	10XUAS_UNC84_attP2	INTACT	135	8.01
s024	C2_d1_rep1	anatomicalCellType:single	pass	C2	C2_d1	10XUAS_UNC84_attP2	INTACT	162	7.89
s042	C2.C3_d1_rep2	anatomicalCellType:multi	pass	C2.C3	C2.C3_d1	10XUAS_UNC84_attP2	INTACT	200	6.9
s041	C2.C3_d1_rep1	anatomicalCellType:multi	pass	C2.C3	C2.C3_d1	10XUAS_UNC84_attP2	INTACT	200	7.89
s027	C3_d1_rep2	anatomicalCellType:single	pass	C3	C3_d1	10XUAS_UNC84_attP2	INTACT	110	7.89
s026	C3_d1_rep1	anatomicalCellType:single	pass	C3	C3_d1	10XUAS_UNC84_attP2	INTACT	180	7.8
s237	CCAP_d1_rep1	broad	suboptimal	CCAP	CCAP_d1	10XUAS_UNC84_attP2	TAPIN	0.75	0.51
s238	CCAP_d1_rep2	broad	suboptimal	CCAP	CCAP_d1	10XUAS_UNC84_attP2	TAPIN	0.75	2.01
s207	ChAT_d1_rep1	broad	pass	ChAT	ChAT_d1	10XUAS_UNC84_attP2	TAPIN	20	4.23
s208	ChAT_d1_rep2	broad	pass	ChAT	ChAT_d1	10XUAS_UNC84_attP2	TAPIN	21	4.2
s056	Crz_d1_rep2	broad	pass	Crz	Crz_d1	10XUAS_UNC84_attP2	TAPIN	50	3.81
s055	Crz_d1_rep1	broad	pass	Crz	Crz_d1	10XUAS_UNC84_attP2	TAPIN	50	4.32
s221	Dm1_d1_rep1	anatomicalCellType:single	pass	Dm1	Dm1_d1	10XUAS_UNC84_attP2	TAPIN	16.9	5.13
s222	Dm1_d1_rep2	anatomicalCellType:single	pass	Dm1	Dm1_d1	10XUAS_UNC84_attP2	TAPIN	20	5.13
s079	Dm10_d1_rep1	anatomicalCellType:single	pass	Dm10	Dm10_d1	10XUAS_UNC84_attP2	TAPIN	31	6.03
s080	Dm10_d1_rep2	anatomicalCellType:single	pass	Dm10	Dm10_d1	10XUAS_UNC84_attP2	TAPIN	35	6.48
s083	Dm11_d1_rep1	anatomicalCellType:single	pass	Dm11	Dm11_d1	10XUAS_UNC84_attP2	TAPIN	12.5	4.86
s084	Dm11_d1_rep2	anatomicalCellType:single	pass	Dm11	Dm11_d1	10XUAS_UNC84_attP2	TAPIN	17.5	5.76
s045	Dm12_d1_rep1	anatomicalCellType:single	pass	Dm12	Dm12_d1	10XUAS_UNC84_attP2	INTACT	4	4.11
s046	Dm12_d1_rep2	anatomicalCellType:single	pass	Dm12	Dm12_d1	10XUAS_UNC84_attP2	INTACT	6	3.99
s223	Dm12_d1_rep3	anatomicalCellType:single	suboptimal	Dm12	Dm12_d1	10XUAS_UNC84_attP2	TAPIN	7	4.38
s224	Dm12_d1_rep4	anatomicalCellType:single	pass	Dm12	Dm12_d1	10XUAS_UNC84_attP2	TAPIN	7	4.83
s157	Dm3_d1_rep1	anatomicalCellType:single	pass	Dm3	Dm3_d1	10XUAS_UNC84_attP2	TAPIN	29.6	4.35
s158	Dm3_d1_rep2	anatomicalCellType:single	pass	Dm3	Dm3_d1	10XUAS_UNC84_attP2	TAPIN	36	5.13
s117	Dm4_d1_rep1	anatomicalCellType:single	pass	Dm4	Dm4_d1	10XUAS_UNC84_attP2	TAPIN	11.2	4.26
s118	Dm4_d1_rep2	anatomicalCellType:single	pass	Dm4	Dm4_d1	10XUAS_UNC84_attP2	TAPIN	12.5	4.8
s101	Dm4_d2_rep1	anatomicalCellType:single	pass	Dm4	Dm4_d2	10XUAS_UNC84_attP2	TAPIN	14	4.83
s102	Dm4_d2_rep2	anatomicalCellType:single	pass	Dm4	Dm4_d2	10XUAS_UNC84_attP2	TAPIN	16.5	5.01
s151	Dm8_d1_rep1	anatomicalCellType:single	pass	Dm8	Dm8_d1	10XUAS_UNC84_attP2	TAPIN	36	4.65
s152	Dm8_d1_rep2	anatomicalCellType:single	pass	Dm8	Dm8_d1	10XUAS_UNC84_attP2	TAPIN	35.2	4.53
s082	Dm9_d1_rep2	anatomicalCellType:single	pass	Dm9	Dm9_d1	10XUAS_UNC84_attP2	TAPIN	30	5.73
s081	Dm9_d1_rep1	anatomicalCellType:single	pass	Dm9	Dm9_d1	10XUAS_UNC84_attP2	TAPIN	32	6.03
s051	Dsk_d1_rep1	broad	suboptimal	Dsk	Dsk_d1	10XUAS_UNC84_attP2	TAPIN	6	2.31
s052	Dsk_d1_rep2	broad	suboptimal	Dsk	Dsk_d1	10XUAS_UNC84_attP2	TAPIN	5	1.95
s205	Gad1_d1_rep1	broad	pass	Gad1	Gad1_d1	13XLexAop2_UNC84_attP18	TAPIN	33	4.74
s206	Gad1_d1_rep2	broad	pass	Gad1	Gad1_d1	13XLexAop2_UNC84_attP18	TAPIN	34	5.31
s144	Glia_Eg_d1_rep2	anatomicalCellType:single	pass	Glia_Eg	Glia_Eg_d1	10XUAS_UNC84_attP2	TAPIN	28	4.11
s143	Glia_Eg_d1_rep1	anatomicalCellType:single	pass	Glia_Eg	Glia_Eg_d1	10XUAS_UNC84_attP2	TAPIN	25	4.56
s147	Glia_Eg_d2_rep1	anatomicalCellType:single	pass	Glia_Eg	Glia_Eg_d2	10XUAS_UNC84_attP2	TAPIN	21	3.33
s148	Glia_Eg_d2_rep2	anatomicalCellType:single	pass	Glia_Eg	Glia_Eg_d2	10XUAS_UNC84_attP2	TAPIN	26	3.51
s145	Glia_Eg_d3_rep1	anatomicalCellType:single	pass	Glia_Eg	Glia_Eg_d3	10XUAS_UNC84_attP2	TAPIN	16	4.32
s146	Glia_Eg_d3_rep2	anatomicalCellType:single	pass	Glia_Eg	Glia_Eg_d3	10XUAS_UNC84_attP2	TAPIN	21	4.71
s137	Glia_Mg_d1_rep1	anatomicalCellType:single	pass	Glia_Mg	Glia_Mg_d1	10XUAS_UNC84_attP2	TAPIN	12	3.93
s138	Glia_Mg_d1_rep2	anatomicalCellType:single	pass	Glia_Mg	Glia_Mg_d1	10XUAS_UNC84_attP2	TAPIN	13	4.14
s139	Glia_Psg_d1_rep1	anatomicalCellType:single	pass	Glia_Psg	Glia_Psg_d1	10XUAS_UNC84_attP2	TAPIN	27	4.02
s140	Glia_Psg_d1_rep2	anatomicalCellType:single	pass	Glia_Psg	Glia_Psg_d1	10XUAS_UNC84_attP2	TAPIN	28	4.62
s141	Glia_Psg_d2_rep1	anatomicalCellType:single	pass	Glia_Psg	Glia_Psg_d2	10XUAS_UNC84_attP2	TAPIN	15	3.84
s142	Glia_Psg_d2_rep2	anatomicalCellType:single	pass	Glia_Psg	Glia_Psg_d2	10XUAS_UNC84_attP2	TAPIN	17	3.84
s054	Ilp2_d1_rep2	broad	suboptimal	Ilp2	Ilp2_d1	10XUAS_UNC84_attP2	TAPIN	20	2.97
s053	Ilp2_d1_rep1	broad	suboptimal	Ilp2	Ilp2_d1	10XUAS_UNC84_attP2	TAPIN	20	3.03
s172	KC_ab_c_d1_rep2	anatomicalCellType:single	pass	KC_ab_c	KC_ab_c_d1	10XUAS_UNC84_attP2	TAPIN	42	4.5
s171	KC_ab_c_d1_rep1	anatomicalCellType:single	pass	KC_ab_c	KC_ab_c_d1	10XUAS_UNC84_attP2	TAPIN	37.6	4.41
s167	KC_ab_c.p.s_d1_rep1	anatomicalCellType:multi	pass	KC_ab_c.p.s	KC_ab_c.p.s_d1	10XUAS_UNC84_attP2	TAPIN	67	4.77
s168	KC_ab_c.p.s_d1_rep2	anatomicalCellType:multi	pass	KC_ab_c.p.s	KC_ab_c.p.s_d1	10XUAS_UNC84_attP2	TAPIN	66	4.53
s165	KC_ab_p_d1_rep1	anatomicalCellType:single	pass	KC_ab_p	KC_ab_p_d1	10XUAS_UNC84_attP2	TAPIN	4.5	4.38
s166	KC_ab_p_d1_rep2	anatomicalCellType:single	pass	KC_ab_p	KC_ab_p_d1	10XUAS_UNC84_attP2	TAPIN	4.5	4.17
s169	KC_ab_s_d1_rep1	anatomicalCellType:single	pass	KC_ab_s	KC_ab_s_d1	10XUAS_UNC84_attP2	TAPIN	27.2	3.63
s170	KC_ab_s_d1_rep2	anatomicalCellType:single	pass	KC_ab_s	KC_ab_s_d1	10XUAS_UNC84_attP2	TAPIN	26.6	4.14
s162	KC_apbp_ap_d1_rep2	anatomicalCellType:single	suboptimal	KC_apbp_ap	KC_apbp_ap_d1	10XUAS_UNC84_attP2	TAPIN	17.8	3.78
s161	KC_apbp_ap_d1_rep1	anatomicalCellType:single	suboptimal	KC_apbp_ap	KC_apbp_ap_d1	10XUAS_UNC84_attP2	TAPIN	17	4.29
s163	KC_apbp_m_d1_rep1	anatomicalCellType:single	suboptimal	KC_apbp_m	KC_apbp_m_d1	10XUAS_UNC84_attP2	TAPIN	4.9	2.79
s164	KC_apbp_m_d1_rep2	anatomicalCellType:single	suboptimal	KC_apbp_m	KC_apbp_m_d1	10XUAS_UNC84_attP2	TAPIN	5	2.82
s250	KC_gd_d1_rep2	anatomicalCellType:single	pass	KC_gd	KC_gd_d1	10XUAS_UNC84_attP2	TAPIN	10.5	4.47
s249	KC_gd_d1_rep1	anatomicalCellType:single	pass	KC_gd	KC_gd_d1	10XUAS_UNC84_attP2	TAPIN	10	4.53
s159	KC_gd_d2_rep1	anatomicalCellType:single	pass	KC_gd	KC_gd_d2	10XUAS_UNC84_attP2	TAPIN	44.8	4.62
s160	KC_gd_d2_rep2	anatomicalCellType:single	pass	KC_gd	KC_gd_d2	10XUAS_UNC84_attP2	TAPIN	40	4.35
s057	Kdm2_d1_rep1	broad	pass	Kdm2	Kdm2_d1	10XUAS_UNC84_attP2	TAPIN	18	3.6
s058	Kdm2_d1_rep2	broad	pass	Kdm2	Kdm2_d1	10XUAS_UNC84_attP2	TAPIN	26	3.36
s014	L1_d1_rep2	anatomicalCellType:single	pass	L1	L1_d1	10XUAS_UNC84_attP2	INTACT	59	6.69
s013	L1_d1_rep1	anatomicalCellType:single	pass	L1	L1_d1	10XUAS_UNC84_attP2	INTACT	54	7.2
s015	L1_d2_rep1	anatomicalCellType:single	pass	L1	L1_d2	10XUAS_UNC84_attP2	INTACT	54	7.11
s016	L1_d2_rep2	anatomicalCellType:single	pass	L1	L1_d2	10XUAS_UNC84_attP2	INTACT	54	7.71
s037	L1.L2_d1_rep1	anatomicalCellType:multi	pass	L1.L2	L1.L2_d1	10XUAS_UNC84_attP2	INTACT	81	7.71
s038	L1.L2_d1_rep2	anatomicalCellType:multi	pass	L1.L2	L1.L2_d1	10XUAS_UNC84_attP2	INTACT	95	7.41
s040	L1.L2_d2_rep2	anatomicalCellType:multi	pass	L1.L2	L1.L2_d2	10XUAS_UNC84_attP2	INTACT	110	7.8
s039	L1.L2_d2_rep1	anatomicalCellType:multi	pass	L1.L2	L1.L2_d2	10XUAS_UNC84_attP2	INTACT	112	7.11
c001	L1L2_aFLAG_beads_rep1	control	suboptimal	mock	L1L2_aFLAG_beads	10XUAS_UNC84_attP2	INTACT	0	1.5
c002	L1L2_aFLAG_beads_rep2	control	suboptimal	mock	L1L2_aFLAG_beads	10XUAS_UNC84_attP2	INTACT	0	2.31
s018	L2_d1_rep2	anatomicalCellType:single	pass	L2	L2_d1	10XUAS_UNC84_attP2	INTACT	90	8.49
s017	L2_d1_rep1	anatomicalCellType:single	pass	L2	L2_d1	10XUAS_UNC84_attP2	INTACT	95	8.49
s019	L3_d1_rep1	anatomicalCellType:single	pass	L3	L3_d1	10XUAS_UNC84_attP2	INTACT	95	7.59
s020	L3_d1_rep2	anatomicalCellType:single	pass	L3	L3_d1	10XUAS_UNC84_attP2	INTACT	50	7.71
s028	L4_d1_rep2	anatomicalCellType:single	pass	L4	L4_d1	10XUAS_UNC84_attP2	INTACT	171	8.79
s021	L4_d1_rep1	anatomicalCellType:single	pass	L4	L4_d1	10XUAS_UNC84_attP2	INTACT	171	9.21
s022	L5_d1_rep1	anatomicalCellType:single	pass	L5	L5_d1	10XUAS_UNC84_attP2	INTACT	90	8.1
s023	L5_d1_rep2	anatomicalCellType:single	pass	L5	L5_d1	10XUAS_UNC84_attP2	INTACT	90	6.99
s035	Lai_d1_rep1	anatomicalCellType:single	pass	Lai	Lai_d1	10XUAS_UNC84_attP2	INTACT	36	6.99
s036	Lai_d1_rep2	anatomicalCellType:single	pass	Lai	Lai_d1	10XUAS_UNC84_attP2	INTACT	45	6.09
s070	lamina_d1_rep1	dissected	pass	lamina	lamina_d1	NA	bulk	NA	5.91
s074	lamina_d1_rep2	dissected	pass	lamina	lamina_d1	NA	bulk	NA	5.73
s072	lamina_d2_rep1	dissected	pass	lamina	lamina_d2	NA	bulk	NA	5.19
s076	lamina_d2_rep2	dissected	pass	lamina	lamina_d2	NA	bulk	NA	5.46
s247	Lat_d1_rep1	anatomicalCellType:single	suboptimal	Lat	Lat_d1	10XUAS_UNC84_attP2	TAPIN	6	3.24
s248	Lat_d1_rep2	anatomicalCellType:single	suboptimal	Lat	Lat_d1	10XUAS_UNC84_attP2	TAPIN	6.3	3.21
s029	Lawf1_d1_rep1	anatomicalCellType:single	pass	Lawf1	Lawf1_d1	10XUAS_UNC84_attP2	INTACT	45	7.29
s030	Lawf1_d1_rep2	anatomicalCellType:single	pass	Lawf1	Lawf1_d1	10XUAS_UNC84_attP2	INTACT	54	7.29
s155	Lawf1_d2_rep1	anatomicalCellType:single	pass	Lawf1	Lawf1_d2	10XUAS_UNC84_attP2	TAPIN	14.4	5.1
s156	Lawf1_d2_rep2	anatomicalCellType:single	pass	Lawf1	Lawf1_d2	10XUAS_UNC84_attP2	TAPIN	13.8	5.31
s031	Lawf2_d1_rep1	anatomicalCellType:single	pass	Lawf2	Lawf2_d1	10XUAS_UNC84_attP2	INTACT	45	7.71
s032	Lawf2_d1_rep2	anatomicalCellType:single	pass	Lawf2	Lawf2_d1	10XUAS_UNC84_attP2	INTACT	23	7.41
s095	LC10a_d1_rep1	anatomicalCellType:single	pass	LC10a	LC10a_d1	10XUAS_UNC84_attP2	TAPIN	10	4.68
s096	LC10a_d1_rep2	anatomicalCellType:single	pass	LC10a	LC10a_d1	10XUAS_UNC84_attP2	TAPIN	9	4.5
s099	LC10b_d1_rep1	anatomicalCellType:single	pass	LC10b	LC10b_d1	10XUAS_UNC84_attP2	TAPIN	10	3.84
s100	LC10b_d1_rep2	anatomicalCellType:single	pass	LC10b	LC10b_d1	10XUAS_UNC84_attP2	TAPIN	7.2	4.41
s219	LC10bc_d1_rep1	anatomicalCellType:single	suboptimal	LC10bc	LC10bc_d1	10XUAS_UNC84_attP2	TAPIN	13.9	3.27
s220	LC10bc_d1_rep2	anatomicalCellType:single	suboptimal	LC10bc	LC10bc_d1	10XUAS_UNC84_attP2	TAPIN	14	4.29
s217	LC10d_d1_rep1	anatomicalCellType:single	suboptimal	LC10d	LC10d_d1	10XUAS_UNC84_attP2	TAPIN	12	2.01
s218	LC10d_d1_rep2	anatomicalCellType:single	suboptimal	LC10d	LC10d_d1	10XUAS_UNC84_attP2	TAPIN	12.4	4.14
s104	LC16_d1_rep2	anatomicalCellType:single	pass	LC16	LC16_d1	10XUAS_UNC84_attP2	TAPIN	24	4.44
s103	LC16_d1_rep1	anatomicalCellType:single	pass	LC16	LC16_d1	10XUAS_UNC84_attP2	TAPIN	20	4.68
s105	LC16_d2_rep1	anatomicalCellType:single	pass	LC16	LC16_d2	10XUAS_UNC84_attP2	TAPIN	18	4.62
s106	LC16_d2_rep2	anatomicalCellType:single	pass	LC16	LC16_d2	10XUAS_UNC84_attP2	TAPIN	16	3.78
s115	LC4_d1_rep1	anatomicalCellType:single	pass	LC4	LC4_d1	10XUAS_UNC84_attP2	TAPIN	35	5.25
s116	LC4_d1_rep2	anatomicalCellType:single	pass	LC4	LC4_d1	10XUAS_UNC84_attP2	TAPIN	37	5.4
s111	LC6_d1_rep1	anatomicalCellType:single	pass	LC6	LC6_d1	10XUAS_UNC84_attP2	TAPIN	24	5.25
s112	LC6_d1_rep2	anatomicalCellType:single	pass	LC6	LC6_d1	10XUAS_UNC84_attP2	TAPIN	22	4.98
s114	LC6_d2_rep2	anatomicalCellType:single	pass	LC6	LC6_d2	10XUAS_UNC84_attP2	TAPIN	20	3.84
s113	LC6_d2_rep1	anatomicalCellType:single	pass	LC6	LC6_d2	10XUAS_UNC84_attP2	TAPIN	24	4.68
s243	lLNv_d1_rep1	anatomicalCellType:single	suboptimal	lLNv	lLNv_d1	10XUAS_UNC84_attP2	TAPIN	1.2	1.29
s244	lLNv_d1_rep2	anatomicalCellType:single	suboptimal	lLNv	lLNv_d1	10XUAS_UNC84_attP2	TAPIN	1.25	2.88
s092	LLPC1_d1_rep2	anatomicalCellType:single	pass	LLPC1	LLPC1_d1	10XUAS_UNC84_attP2	TAPIN	18.5	5.34
s091	LLPC1_d1_rep1	anatomicalCellType:single	pass	LLPC1	LLPC1_d1	10XUAS_UNC84_attP2	TAPIN	17	5.37
s094	LPC1_d1_rep2	anatomicalCellType:single	pass	LPC1	LPC1_d1	10XUAS_UNC84_attP2	TAPIN	19	5.13
s093	LPC1_d1_rep1	anatomicalCellType:single	pass	LPC1	LPC1_d1	10XUAS_UNC84_attP2	TAPIN	22	4.89
s097	LPC1_d2_rep1	anatomicalCellType:single	pass	LPC1	LPC1_d2	10XUAS_UNC84_attP2	TAPIN	22	4.29
s098	LPC1_d2_rep2	anatomicalCellType:single	pass	LPC1	LPC1_d2	10XUAS_UNC84_attP2	TAPIN	18	4.56
s132	LPi-34_d1_rep2	anatomicalCellType:single	pass	LPi-34	LPi-34_d1	10XUAS_UNC84_attP2	TAPIN	4.8	4.38
s131	LPi-34_d1_rep1	anatomicalCellType:single	pass	LPi-34	LPi-34_d1	10XUAS_UNC84_attP2	TAPIN	4.5	4.23
s107	LPLC1_d1_rep1	anatomicalCellType:single	pass	LPLC1	LPLC1_d1	10XUAS_UNC84_attP2	TAPIN	8.5	4.86
s108	LPLC1_d1_rep2	anatomicalCellType:single	pass	LPLC1	LPLC1_d1	10XUAS_UNC84_attP2	TAPIN	12.4	4.74
s110	LPLC2_d1_rep2	anatomicalCellType:single	pass	LPLC2	LPLC2_d1	10XUAS_UNC84_attP2	TAPIN	24	5.79
s109	LPLC2_d1_rep1	anatomicalCellType:single	pass	LPLC2	LPLC2_d1	10XUAS_UNC84_attP2	TAPIN	24	5.64
s235	LPTC_HS.VS_d1_rep1	anatomicalCellType:single	suboptimal	LPTC_HS.VS	LPTC_HS.VS_d1	10XUAS_UNC84_attP2	TAPIN	12.4	2.82
s236	LPTC_HS.VS_d1_rep2	anatomicalCellType:single	suboptimal	LPTC_HS.VS	LPTC_HS.VS_d1	10XUAS_UNC84_attP2	TAPIN	11	3.15
s185	MBON_bp1_d1_rep1	anatomicalCellType:single	suboptimal	MBON_bp1	MBON_bp1_d1	10XUAS_UNC84_attP2	TAPIN	2.1	2.7
s186	MBON_bp1_d1_rep2	anatomicalCellType:single	suboptimal	MBON_bp1	MBON_bp1_d1	10XUAS_UNC84_attP2	TAPIN	1.7	1.92
s246	MBON_g1pedc_d1_rep2	anatomicalCellType:single	suboptimal	MBON_g1pedc	MBON_g1pedc_d1	10XUAS_UNC84_attP2	TAPIN	0.7	2.31
s245	MBON_g1pedc_d1_rep1	anatomicalCellType:single	suboptimal	MBON_g1pedc	MBON_g1pedc_d1	10XUAS_UNC84_attP2	TAPIN	0.7	1.32
s002	Mi1_d1_rep2	anatomicalCellType:single	pass	Mi1	Mi1_d1	10XUAS_UNC84_attP2	INTACT	153	8.49
s001	Mi1_d1_rep1	anatomicalCellType:single	pass	Mi1	Mi1_d1	10XUAS_UNC84_attP2	INTACT	190	8.19
s215	Mi15_d1_rep1	anatomicalCellType:single	pass	Mi15	Mi15_d1	10XUAS_UNC84_attP2	TAPIN	31	5.37
s216	Mi15_d1_rep2	anatomicalCellType:single	pass	Mi15	Mi15_d1	10XUAS_UNC84_attP2	TAPIN	30	5.16
s087	Mi15_d2_rep1	anatomicalCellType:single	pass	Mi15	Mi15_d2	10XUAS_UNC84_attP2	TAPIN	31	5.22
s088	Mi15_d2_rep2	anatomicalCellType:single	pass	Mi15	Mi15_d2	10XUAS_UNC84_attP2	TAPIN	30.5	5.34
s007	Mi4_d1_rep1	anatomicalCellType:single	pass	Mi4	Mi4_d1	10XUAS_UNC84_attP2	INTACT	23	6.51
s008	Mi4_d1_rep2	anatomicalCellType:single	pass	Mi4	Mi4_d1	10XUAS_UNC84_attP2	INTACT	36	7.71
s212	Mi9_d1_rep2	anatomicalCellType:single	pass	Mi9	Mi9_d1	10XUAS_UNC84_attP2	TAPIN	14.2	3.84
s211	Mi9_d1_rep1	anatomicalCellType:single	pass	Mi9	Mi9_d1	10XUAS_UNC84_attP2	TAPIN	14	4.68
s214	Mi9_d2_rep2	anatomicalCellType:single	pass	Mi9	Mi9_d2	10XUAS_UNC84_attP2	TAPIN	19	5.34
s213	Mi9_d2_rep1	anatomicalCellType:single	pass	Mi9	Mi9_d2	10XUAS_UNC84_attP2	TAPIN	18	5.1
c016	mock2_rep2	control	suboptimal	mock2	mock2	10XUAS_UNC84_attP2	TAPIN	0	0.36
c015	mock2_rep1	control	suboptimal	mock2	mock2	10XUAS_UNC84_attP2	TAPIN	0	0.3
s226	Muscles_App_d1_rep2	anatomicalCellType:single	pass	Muscles_App	Muscles_App_d1	5XUAS_UNC84_attP18	TAPIN	43	5.04
s225	Muscles_App_d1_rep1	anatomicalCellType:single	pass	Muscles_App	Muscles_App_d1	5XUAS_UNC84_attP18	TAPIN	47	5.13
s227	Muscles_Head_d1_rep1	anatomicalCellType:single	pass	Muscles_Head	Muscles_Head_d1	5XUAS_UNC84_attP18	TAPIN	27	5.04
s228	Muscles_Head_d1_rep2	anatomicalCellType:single	pass	Muscles_Head	Muscles_Head_d1	5XUAS_UNC84_attP18	TAPIN	27	5.22
s229	Muscles_Head_d2_rep1	anatomicalCellType:single	suboptimal	Muscles_Head	Muscles_Head_d2	5XUAS_UNC84_attP18	TAPIN	8.5	4.8
s230	Muscles_Head_d2_rep2	anatomicalCellType:single	suboptimal	Muscles_Head	Muscles_Head_d2	5XUAS_UNC84_attP18	TAPIN	10	5.16
c004	no_driver_aGFP_beads_rep2	control	suboptimal	mock	no_driver_aGFP_beads	10XUAS_UNC84_attP2	INTACT	0	2.1
c013	no_driver_aGFP_beads_rep3	control	suboptimal	mock2	no_driver_aGFP_beads	10XUAS_UNC84_attP2	TAPIN	0	0.3
c003	no_driver_aGFP_beads_rep1	control	suboptimal	mock	no_driver_aGFP_beads	10XUAS_UNC84_attP2	INTACT	0	1.8
c014	no_driver_aGFP_beads_rep4	control	suboptimal	mock2	no_driver_aGFP_beads	10XUAS_UNC84_attP2	TAPIN	0	0.3
s050	NPF_d1_rep2	broad	pass	NPF	NPF_d1	10XUAS_UNC84_attP2	TAPIN	23	3.6
s049	NPF_d1_rep1	broad	pass	NPF	NPF_d1	10XUAS_UNC84_attP2	TAPIN	26	3.66
s239	NPF_d1_rep3	broad	suboptimal	NPF	NPF_d1	10XUAS_UNC84_attP2	TAPIN	2.5	2.79
s240	NPF_d1_rep4	broad	suboptimal	NPF	NPF_d1	10XUAS_UNC84_attP2	TAPIN	2.7	3.99
s069	opticlobe_d1_rep1	dissected	pass	opticlobe	opticlobe_d1	NA	bulk	NA	6.54
s073	opticlobe_d1_rep2	dissected	pass	opticlobe	opticlobe_d1	NA	bulk	NA	6.27
s071	opticlobe_d2_rep1	dissected	pass	opticlobe	opticlobe_d2	NA	bulk	NA	6.45
s075	opticlobe_d2_rep2	dissected	pass	opticlobe	opticlobe_d2	NA	bulk	NA	6.09
s184	PAM_1_d1_rep2	anatomicalCellType:single	pass	PAM_1	PAM_1_d1	10XUAS_UNC84_attP2	TAPIN	3.7	3.45
s183	PAM_1_d1_rep1	anatomicalCellType:single	pass	PAM_1	PAM_1_d1	10XUAS_UNC84_attP2	TAPIN	3.4	3.81
s203	PAM_2_d1_rep1	anatomicalCellType:single	suboptimal	PAM_2	PAM_2_d1	10XUAS_UNC84_attP2	TAPIN	5.5	3.99
s204	PAM_2_d1_rep2	anatomicalCellType:single	suboptimal	PAM_2	PAM_2_d1	10XUAS_UNC84_attP2	TAPIN	5.5	3.57
s187	PAM_3_d1_rep1	anatomicalCellType:single	pass	PAM_3	PAM_3_d1	10XUAS_UNC84_attP2	TAPIN	4.9	3.87
s188	PAM_3_d1_rep2	anatomicalCellType:single	pass	PAM_3	PAM_3_d1	10XUAS_UNC84_attP2	TAPIN	3.6	3.51
s179	PAM_4_d1_rep1	anatomicalCellType:single	pass	PAM_4	PAM_4_d1	10XUAS_UNC84_attP2	TAPIN	19	3.24
s180	PAM_4_d1_rep2	anatomicalCellType:single	pass	PAM_4	PAM_4_d1	10XUAS_UNC84_attP2	TAPIN	26.2	4.38
s181	PAM_5_d1_rep1	anatomicalCellType:single	suboptimal	PAM_5	PAM_5_d1	10XUAS_UNC84_attP2	TAPIN	7.3	2.4
s182	PAM_5_d1_rep2	anatomicalCellType:single	suboptimal	PAM_5	PAM_5_d1	10XUAS_UNC84_attP2	TAPIN	6	3.54
s202	PAM_6_d1_rep2	anatomicalCellType:single	suboptimal	PAM_6	PAM_6_d1	10XUAS_UNC84_attP2	TAPIN	2.3	3.96
s201	PAM_6_d1_rep1	anatomicalCellType:single	suboptimal	PAM_6	PAM_6_d1	10XUAS_UNC84_attP2	TAPIN	2.5	3.96
s174	PAM_7_d1_rep2	anatomicalCellType:single	suboptimal	PAM_7	PAM_7_d1	10XUAS_UNC84_attP2	TAPIN	4	2.79
s173	PAM_7_d1_rep1	anatomicalCellType:single	suboptimal	PAM_7	PAM_7_d1	10XUAS_UNC84_attP2	TAPIN	6	2.22
s177	PAM_8_d1_rep1	anatomicalCellType:single	suboptimal	PAM_8	PAM_8_d1	10XUAS_UNC84_attP2	TAPIN	5.7	3
s178	PAM_8_d1_rep2	anatomicalCellType:single	suboptimal	PAM_8	PAM_8_d1	10XUAS_UNC84_attP2	TAPIN	4.8	3.36
s175	PAM_9_d1_rep1	anatomicalCellType:single	suboptimal	PAM_9	PAM_9_d1	10XUAS_UNC84_attP2	TAPIN	3.6	2.58
s176	PAM_9_d1_rep2	anatomicalCellType:single	suboptimal	PAM_9	PAM_9_d1	10XUAS_UNC84_attP2	TAPIN	3.7	2.25
s129	PB_1_d1_rep1	anatomicalCellType:single	pass	PB_1	PB_1_d1	10XUAS_UNC84_attP2	TAPIN	10.2	4.65
s130	PB_1_d1_rep2	anatomicalCellType:single	pass	PB_1	PB_1_d1	10XUAS_UNC84_attP2	TAPIN	9.7	4.56
s127	PB_2_d1_rep1	anatomicalCellType:single	pass	PB_2	PB_2_d1	10XUAS_UNC84_attP2	TAPIN	8.9	3.84
s128	PB_2_d1_rep2	anatomicalCellType:single	pass	PB_2	PB_2_d1	10XUAS_UNC84_attP2	TAPIN	7.6	4.23
s134	PB_3_d1_rep2	anatomicalCellType:single	pass	PB_3	PB_3_d1	10XUAS_UNC84_attP2	TAPIN	13.5	3.96
s133	PB_3_d1_rep1	anatomicalCellType:single	pass	PB_3	PB_3_d1	10XUAS_UNC84_attP2	TAPIN	10.5	4.41
s119	PB_4_d1_rep1	anatomicalCellType:single	pass	PB_4	PB_4_d1	10XUAS_UNC84_attP2	TAPIN	10.6	3.96
s120	PB_4_d1_rep2	anatomicalCellType:single	pass	PB_4	PB_4_d1	10XUAS_UNC84_attP2	TAPIN	13.3	4.32
s122	PB_4_d2_rep2	anatomicalCellType:single	pass	PB_4	PB_4_d2	10XUAS_UNC84_attP2	TAPIN	20	4.62
s121	PB_4_d2_rep1	anatomicalCellType:single	pass	PB_4	PB_4_d2	10XUAS_UNC84_attP2	TAPIN	24	4.71
s125	PB_5_d1_rep1	anatomicalCellType:single	pass	PB_5	PB_5_d1	10XUAS_UNC84_attP2	TAPIN	5.2	4.41
s126	PB_5_d1_rep2	anatomicalCellType:single	pass	PB_5	PB_5_d1	10XUAS_UNC84_attP2	TAPIN	4.6	4.23
s135	PB_6_d1_rep1	anatomicalCellType:single	suboptimal	PB_6	PB_6_d1	10XUAS_UNC84_attP2	TAPIN	5.2	2.58
s136	PB_6_d1_rep2	anatomicalCellType:single	suboptimal	PB_6	PB_6_d1	10XUAS_UNC84_attP2	TAPIN	3.8	2.43
s242	Pdf_d1_rep2	broad	suboptimal	Pdf	Pdf_d1	10XUAS_UNC84_attP2	TAPIN	7.5	3.36
s241	Pdf_d1_rep1	broad	suboptimal	Pdf	Pdf_d1	10XUAS_UNC84_attP2	TAPIN	7	3.33
s123	Pm3_d1_rep1	anatomicalCellType:single	pass	Pm3	Pm3_d1	10XUAS_UNC84_attP2	TAPIN	21	4.59
s124	Pm3_d1_rep2	anatomicalCellType:single	pass	Pm3	Pm3_d1	10XUAS_UNC84_attP2	TAPIN	29	4.44
s085	Pm4_d1_rep1	anatomicalCellType:single	pass	Pm4	Pm4_d1	10XUAS_UNC84_attP2	TAPIN	14.5	4.74
s086	Pm4_d1_rep2	anatomicalCellType:single	pass	Pm4	Pm4_d1	10XUAS_UNC84_attP2	TAPIN	15.5	5.16
s067	R1-6_d1_rep3	anatomicalCellType:single	pass	R1-6	R1-6_d1	10XUAS_UNC84_attP2	TAPIN	22	6.24
s043	R1-6_d1_rep1	anatomicalCellType:single	pass	R1-6	R1-6_d1	10XUAS_UNC84_attP2	INTACT	NA	4.5
s044	R1-6_d1_rep2	anatomicalCellType:single	pass	R1-6	R1-6_d1	10XUAS_UNC84_attP2	INTACT	NA	3.9
s068	R1-6_d1_rep4	anatomicalCellType:single	pass	R1-6	R1-6_d1	10XUAS_UNC84_attP2	TAPIN	23	5.1
s066	R7_d1_rep2	anatomicalCellType:single	pass	R7	R7_d1	10XUAS_UNC84_attP2	TAPIN	9	4.89
s065	R7_d1_rep1	anatomicalCellType:single	pass	R7	R7_d1	10XUAS_UNC84_attP2	TAPIN	10	4.98
s060	R7_Rh3_d1_rep2	anatomicalCellType:single	suboptimal	R7_Rh3	R7_Rh3_d1	10XUAS_UNC84_attP2	TAPIN	5	5.37
s059	R7_Rh3_d1_rep1	anatomicalCellType:single	suboptimal	R7_Rh3	R7_Rh3_d1	10XUAS_UNC84_attP2	TAPIN	10.5	4.23
s061	R8_Rh5_d1_rep1	anatomicalCellType:single	pass	R8_Rh5	R8_Rh5_d1	10XUAS_UNC84_attP2	TAPIN	23	5.55
s062	R8_Rh5_d1_rep2	anatomicalCellType:single	pass	R8_Rh5	R8_Rh5_d1	10XUAS_UNC84_attP2	TAPIN	22	5.4
s063	R8_Rh6_d1_rep1	anatomicalCellType:single	pass	R8_Rh6	R8_Rh6_d1	10XUAS_UNC84_attP2	TAPIN	33	5.49
s064	R8_Rh6_d1_rep2	anatomicalCellType:single	pass	R8_Rh6	R8_Rh6_d1	10XUAS_UNC84_attP2	TAPIN	32	5.52
s033	T1_d1_rep1	anatomicalCellType:single	pass	T1	T1_d1	10XUAS_UNC84_attP2	INTACT	180	8.61
s034	T1_d1_rep2	anatomicalCellType:single	pass	T1	T1_d1	10XUAS_UNC84_attP2	INTACT	144	7.8
s191	T4_d1_rep1	anatomicalCellType:single	pass	T4	T4_d1	10XUAS_UNC84_attP2	TAPIN	9	4.86
s192	T4_d1_rep2	anatomicalCellType:single	pass	T4	T4_d1	10XUAS_UNC84_attP2	TAPIN	10	5.1
s190	T4_d2_rep2	anatomicalCellType:single	pass	T4	T4_d2	10XUAS_UNC84_attP2	TAPIN	9.5	5.34
s189	T4_d2_rep1	anatomicalCellType:single	pass	T4	T4_d2	10XUAS_UNC84_attP2	TAPIN	9	5.61
s199	T4.T5_d1_rep1	anatomicalCellType:multi	pass	T4.T5	T4.T5_d1	10XUAS_UNC84_attP2	TAPIN	55.2	6.24
s200	T4.T5_d1_rep2	anatomicalCellType:multi	pass	T4.T5	T4.T5_d1	10XUAS_UNC84_attP2	TAPIN	50.1	6.03
s233	T4.T5_d1_female_rep1	anatomicalCellType:multi	pass	T4.T5	T4.T5_d1_female	10XUAS_UNC84_attP2	TAPIN	32.8	5.85
s234	T4.T5_d1_female_rep2	anatomicalCellType:multi	pass	T4.T5	T4.T5_d1_female	10XUAS_UNC84_attP2	TAPIN	32	5.64
s231	T4.T5_d1_male_rep1	anatomicalCellType:multi	pass	T4.T5	T4.T5_d1_male	10XUAS_UNC84_attP2	TAPIN	34	5.46
s232	T4.T5_d1_male_rep2	anatomicalCellType:multi	pass	T4.T5	T4.T5_d1_male	10XUAS_UNC84_attP2	TAPIN	36	5.88
s197	T4.T5_d2_rep1	anatomicalCellType:multi	pass	T4.T5	T4.T5_d2	10XUAS_UNC84_attP2	TAPIN	26	5.85
s198	T4.T5_d2_rep2	anatomicalCellType:multi	pass	T4.T5	T4.T5_d2	10XUAS_UNC84_attP2	TAPIN	25	5.76
s194	T5_d1_rep2	anatomicalCellType:single	pass	T5	T5_d1	10XUAS_UNC84_attP2	TAPIN	8.3	5.28
s193	T5_d1_rep1	anatomicalCellType:single	pass	T5	T5_d1	10XUAS_UNC84_attP2	TAPIN	8.5	4.32
s195	T5_d2_rep1	anatomicalCellType:single	pass	T5	T5_d2	10XUAS_UNC84_attP2	TAPIN	11	4.68
s196	T5_d2_rep2	anatomicalCellType:single	pass	T5	T5_d2	10XUAS_UNC84_attP2	TAPIN	11	4.98
s047	Tm1_d1_rep1	anatomicalCellType:single	pass	Tm1	Tm1_d1	10XUAS_UNC84_attP2	TAPIN	30	5.91
s048	Tm1_d1_rep2	anatomicalCellType:single	pass	Tm1	Tm1_d1	10XUAS_UNC84_attP2	TAPIN	32	5.43
c007	Tm1_d1_capture1_rep1	control	suboptimal	Tm1	Tm1_d1_capture1	10XUAS_UNC84_attP2	TAPIN	53	7.02
c008	Tm1_d1_capture1_rep2	control	suboptimal	Tm1	Tm1_d1_capture1	10XUAS_UNC84_attP2	TAPIN	50	6.06
c005	Tm1_d1_input_rep1	control	suboptimal	input	Tm1_d1_input	10XUAS_UNC84_attP2	TAPIN	NA	6.63
c006	Tm1_d1_input_rep2	control	suboptimal	input	Tm1_d1_input	10XUAS_UNC84_attP2	TAPIN	NA	5.94
c009	Tm1_d1_mock1_rep1	control	suboptimal	mock1	Tm1_d1_mock1	10XUAS_UNC84_attP2	TAPIN	0	3.84
c010	Tm1_d1_mock1_rep2	control	suboptimal	mock1	Tm1_d1_mock1	10XUAS_UNC84_attP2	TAPIN	0	3.48
c011	Tm1_d1_mock2_rep1	control	suboptimal	mock2	Tm1_d1_mock2	10XUAS_UNC84_attP2	TAPIN	0	0.57
c012	Tm1_d1_mock2_rep2	control	suboptimal	mock2	Tm1_d1_mock2	10XUAS_UNC84_attP2	TAPIN	0	0.66
s010	Tm2_d1_rep2	anatomicalCellType:single	pass	Tm2	Tm2_d1	10XUAS_UNC84_attP2	INTACT	23	6.99
s009	Tm2_d1_rep1	anatomicalCellType:single	pass	Tm2	Tm2_d1	10XUAS_UNC84_attP2	INTACT	68	6.99
s154	Tm20_d1_rep2	anatomicalCellType:single	pass	Tm20	Tm20_d1	10XUAS_UNC84_attP2	TAPIN	32	5.16
s153	Tm20_d1_rep1	anatomicalCellType:single	pass	Tm20	Tm20_d1	10XUAS_UNC84_attP2	TAPIN	36	5.31
s150	Tm29_d1_rep2	anatomicalCellType:single	pass	Tm29	Tm29_d1	10XUAS_UNC84_attP2	TAPIN	168	4.47
s149	Tm29_d1_rep1	anatomicalCellType:single	pass	Tm29	Tm29_d1	10XUAS_UNC84_attP2	TAPIN	16	4.2
s003	Tm3_d1_rep1	anatomicalCellType:single	pass	Tm3	Tm3_d1	10XUAS_UNC84_attP2	INTACT	72	7.5
s004	Tm3_d1_rep2	anatomicalCellType:single	pass	Tm3	Tm3_d1	10XUAS_UNC84_attP2	INTACT	81	7.11
s006	Tm4_d1_rep2	anatomicalCellType:single	pass	Tm4	Tm4_d1	10XUAS_UNC84_attP2	INTACT	27	6.09
s005	Tm4_d1_rep1	anatomicalCellType:single	pass	Tm4	Tm4_d1	10XUAS_UNC84_attP2	INTACT	18	6.81
s012	Tm9_d1_rep2	anatomicalCellType:single	pass	Tm9	Tm9_d1	10XUAS_UNC84_attP2	INTACT	81	6.99
s011	Tm9_d1_rep1	anatomicalCellType:single	pass	Tm9	Tm9_d1	10XUAS_UNC84_attP2	INTACT	72	7.59
s077	TmY3_d1_rep1	anatomicalCellType:single	pass	TmY3	TmY3_d1	10XUAS_UNC84_attP2	TAPIN	28	5.73
s078	TmY3_d1_rep2	anatomicalCellType:single	pass	TmY3	TmY3_d1	10XUAS_UNC84_attP2	TAPIN	29	6.03
s089	TmY5a_d1_rep1	anatomicalCellType:single	pass	TmY5a	TmY5a_d1	10XUAS_UNC84_attP2	TAPIN	27	5.52
s090	TmY5a_d1_rep2	anatomicalCellType:single	pass	TmY5a	TmY5a_d1	10XUAS_UNC84_attP2	TAPIN	29	5.79
s209	VGlut_d1_rep1	broad	pass	VGlut	VGlut_d1	10XUAS_UNC84_attP2	TAPIN	35	4.92
s210	VGlut_d1_rep2	broad	pass	VGlut	VGlut_d1	10XUAS_UNC84_attP2	TAPIN	35	5.4

## Sheet: TableS3_benchmark_entries
	cell	gene	state	ref
1	L4	ap	+	Hasegawa13,Morante08
2	Tm20	ap	+	Li13
3	R1-6	Arr1	+	Smith90,Dolph93
4	R7	Arr1	+	Smith90,Dolph93
5	R8_Rh5	Arr1	+	Smith90,Dolph93
6	R8_Rh6	Arr1	+	Smith90,Dolph93
7	R1-6	Arr2	+	Satoh10
8	R1-6	Atpalpha	+	Lebovitz89
9	R7	Atpalpha	+	Lebovitz89
10	R8_Rh5	Atpalpha	+	Lebovitz89
11	R8_Rh6	Atpalpha	+	Lebovitz89
12	Glia_Eg	b	+	Ziegler13
13	R1-6	boss	+	Hart93
14	R7	boss	+	Hart93
15	R8_Rh5	boss	+	Hart93
16	R8_Rh6	boss	+	Hart93
17	R1-6	brp	+	Hamanaka10
18	R1-6	brp	+	Hamanaka10
19	R7	brp	+	Hamanaka10
20	R8_Rh5	brp	+	Hamanaka10
21	R8_Rh6	brp	+	Hamanaka10
22	L1	bsh	-	Hasegawa13
23	L2	bsh	-	Hasegawa13
24	L3	bsh	-	Hasegawa13
25	L4	bsh	+	Hasegawa13
26	L5	bsh	+	Hasegawa13
27	R1-6	CadN	+	Iwai02
28	R7	CadN	+	Iwai02
29	R8_Rh5	CadN	+	Iwai02
30	R8_Rh6	CadN	+	Iwai02
31	R1-6	Cam	+	Hanson-Painton92
32	R7	Cam	+	Hanson-Painton92
33	R8_Rh5	Cam	+	Hanson-Painton92
34	R8_Rh6	Cam	+	Hanson-Painton92
35	Mi1	ChAT	+	Hasegawa11
36	R1-6	chp	+	Hiesinger01,Reinke..Zipursky88
37	R7	chp	+	Hiesinger01,Reinke..Zipursky88
38	R8_Rh5	chp	+	Hiesinger01,Reinke..Zipursky88
39	R8_Rh6	chp	+	Hiesinger01,Reinke..Zipursky88
40	R1-6	Cp1	+	Kinser12
41	R7	Cp1	+	Kinser12
42	R8_Rh5	Cp1	+	Kinser12
43	R8_Rh6	Cp1	+	Kinser12
44	R1-6	Cpn	+	Martin..Miller93
45	R7	Cpn	+	Martin..Miller93
46	R8_Rh5	Cpn	+	Martin..Miller93
47	R8_Rh6	Cpn	+	Martin..Miller93
48	R1-6	Cpn	+	Martin93
49	R7	Cpn	+	Martin93
50	R8_Rh5	Cpn	+	Martin93
51	R8_Rh6	Cpn	+	Martin93
52	R1-6	crb	+	Johnson..Knust02
53	R7	crb	+	Johnson..Knust02
54	R8_Rh5	crb	+	Johnson..Knust02
55	R8_Rh6	crb	+	Johnson..Knust02
56	R1-6	Csp	+	Hamanaka10
57	R1-6	Csp	+	Zinsmaier94
58	R7	Csp	+	Zinsmaier94
59	R8_Rh5	Csp	+	Zinsmaier94
60	R8_Rh6	Csp	+	Zinsmaier94
61	Tm9	ct	+	Hasegawa11
62	Dm8	dac	+	Hasegawa11
63	L1	dac	+	Hasegawa13
64	L2	dac	-	Hasegawa13
65	L3	dac	+	Hasegawa13
66	L4	dac	+	Hasegawa13
67	L5	dac	+	Hasegawa13
68	Tm9	dac	+	Hasegawa11
69	R1-6	dco	+	Kloss98
70	R7	dco	+	Kloss98
71	R8_Rh5	dco	+	Kloss98
72	R8_Rh6	dco	+	Kloss98
73	R1-6	dlg1	+	Kolodziejczyk08,Hamanaka10
74	R1-6	elav	+	Robinow91
75	R7	elav	+	Robinow91
76	R8_Rh5	elav	+	Robinow91
77	R8_Rh6	elav	+	Robinow91
78	Glia_Eg	e	+	Richardt02,Ziegler13
79	R1-6	Eps-15	+	Hamanaka10
80	R1-6	Fatp	+	Dourlen12
81	C2	GABA-B-R2	+	Kolodziejczyk08
82	C3	GABA-B-R2	+	Kolodziejczyk08
83	C2	Gad1	+	Kolodziejczyk08
84	C3	Gad1	+	Kolodziejczyk08
85	R1-6	Galphaq	+	Schulz99
86	R7	Galphaq	+	Schulz99
87	R8_Rh5	Galphaq	+	Schulz99
88	R8_Rh6	Galphaq	+	Schulz99
89	R1-6	Gbeta76C	+	Schulz99
90	R7	Gbeta76C	+	Schulz99
91	R8_Rh5	Gbeta76C	+	Schulz99
92	R8_Rh6	Gbeta76C	+	Schulz99
93	R1-6	Ggamma30A	+	Sculz99
94	R7	Ggamma30A	+	Sculz99
95	R8_Rh5	Ggamma30A	+	Sculz99
96	R8_Rh6	Ggamma30A	+	Sculz99
97	L1	Ih	+	Hu15
98	L2	Ih	+	Hu15
99	R1-6	inaC	+	Smith91
100	R7	inaC	+	Smith91
101	R8_Rh5	inaC	+	Smith91
102	R8_Rh6	inaC	+	Smith91
103	Glia_Eg	Khc	+	Hamanaka10
104	R1-6	Khc	+	Hamanaka10
105	R1-6	ktub	+	Chen12
106	R1-6	Myo61F	+	Hegan07
107	R7	Myo61F	+	Hegan07
108	R8_Rh5	Myo61F	+	Hegan07
109	R8_Rh6	Myo61F	+	Hegan07
110	L3	NetB	+	Timofeev12
111	R1-6	ninaE	+	Wang12
112	R1-6	nonA	+	Rendahl92
113	R7	nonA	+	Rendahl92
114	R8_Rh5	nonA	+	Rendahl92
115	R8_Rh6	nonA	+	Rendahl92
116	R1-6	norpA	+	Bloomquist1988,Zhu1993
117	R7	norpA	+	Bloomquist1988,Zhu1993
118	R8_Rh5	norpA	+	Bloomquist1988,Zhu1993
119	R8_Rh6	norpA	+	Bloomquist1988,Zhu1993
120	R1-6	Nrx-1	+	Tian13
121	R1-6	nSyb	+	DiAntonio93,Hiesinger01
122	R7	nSyb	+	DiAntonio93,Hiesinger01
123	R8_Rh5	nSyb	+	DiAntonio93,Hiesinger01
124	R8_Rh6	nSyb	+	DiAntonio93,Hiesinger01
125	R1-6	onecut	+	Nguyen00
126	R7	onecut	+	Nguyen00
127	R8_Rh5	onecut	+	Nguyen00
128	R8_Rh6	onecut	+	Nguyen00
129	R1-6	para	+	Amichot93
130	R7	para	+	Amichot93
131	R8_Rh5	para	+	Amichot93
132	R8_Rh6	para	+	Amichot93
133	R1-6	Pph13	+	Goriely99;Zelhof03
134	R7	Pph13	+	Goriely99;Zelhof03
135	R8_Rh5	Pph13	+	Goriely99;Zelhof03
136	R8_Rh6	Pph13	+	Goriely99;Zelhof03
137	R1-6	Rab11	+	Alone05
138	R7	Rab11	+	Alone05
139	R8_Rh5	Rab11	+	Alone05
140	R8_Rh6	Rab11	+	Alone05
141	R8_Rh5	Rh5	+	Papatsenko1998,Chou96
142	R8_Rh6	Rh6	+	Yasuyama99,Papatsenko01
143	R1-6	rtp	+	Venkatachalam10
144	R7	salm	+	Domingos04
145	R8_Rh5	salm	+	Domingos04
146	R8_Rh6	salm	+	Domingos04
147	R8_Rh5	sens	+	Wernet03
148	R8_Rh6	sens	+	Wernet03
149	R1-6	sif	+	Sone97
150	R7	sif	+	Sone97
151	R8_Rh5	sif	+	Sone97
152	R8_Rh6	sif	+	Sone97
153	R1-6	so	+	Serikaku94
154	R7	so	+	Serikaku94
155	R7	ss	+	Thanawala13
156	R1-6	Synj	+	Verstreken03
157	R1-6	Syn	+	Hamanaka10
158	R1-6	Syx1A	+	Hiesinger01
159	R7	Syx1A	+	Hiesinger01
160	R8_Rh5	Syx1A	+	Hiesinger01
161	R8_Rh6	Syx1A	+	Hiesinger01
162	R1-6	tim	+	Kloss98,Myers96
163	R7	tim	+	Kloss98,Myers96
164	R8_Rh5	tim	+	Kloss98,Myers96
165	R8_Rh6	tim	+	Kloss98,Myers96
166	Tm20	toy	+	Li13
167	R1-6	t	+	Wagner07
168	R7	t	+	Wagner07
169	R8_Rh5	t	+	Wagner07
170	R8_Rh6	t	+	Wagner07
171	R1-6	trp	+	Wong89,Montell89,Tian13
172	R7	trp	+	Wong89,Montell89,Tian13
173	R8_Rh5	trp	+	Wong89,Montell89,Tian13
174	R8_Rh6	trp	+	Wong89,Montell89,Tian13
175	L2	VAChT	+	Kolodziejczyk08
176	L4	VAChT	+	Kolodziejczyk08
177	R1-6	veli	+	Bachmann08
178	R7	veli	+	Bachmann08
179	R8_Rh5	veli	+	Bachmann08
180	R8_Rh6	veli	+	Bachmann08
181	R1-6	verm	+	McKay08
182	R7	verm	+	McKay08
183	R8_Rh5	verm	+	McKay08
184	R8_Rh6	verm	+	McKay08
185	Dm8	VGlut	+	Karuppudurai14
186	R1-6	Vps26	+	Wang14
187	R1-6	Xport-A	+	Rosenbaum11
188	R7	Xport-A	+	Rosenbaum11
189	R8_Rh5	Xport-A	+	Rosenbaum11
190	R8_Rh6	Xport-A	+	Rosenbaum11
191	Glia_Eg	repo	+	Ziegler13
192	ChAT	ChAT	+	driver.type
193	VGlut	VGlut	+	driver.type
194	Gad1	Gad1	+	driver.type
195	Crz	Crz	+	driver.type
196	NPF	NPF	+	driver.type
197	Kdm2	Kdm2	+	driver.type

## Sheet: TableS4_markerGenes
cellGroup	markerGene
pr	Arr1
pr	Arr2
pr	BobA
pr	boss
pr	BuGZ
pr	CarT
pr	cdi
pr	CG10877
pr	CG10962
pr	CG11318
pr	CG11630
pr	CG12209
pr	CG12661
pr	CG12662
pr	CG12911
pr	CG15118
pr	CG15221
pr	CG15369
pr	CG15517
pr	CG15553
pr	CG15556
pr	CG1690
pr	CG17005
pr	CG17159
pr	CG2246
pr	CG30054
pr	CG30343
pr	CG31019
pr	CG31516
pr	CG32298
pr	CG32299
pr	CG33510
pr	CG33511
pr	CG34141
pr	CG34245
pr	CG3812
pr	CG42383
pr	CG43255
pr	CG43446
pr	CG44195
pr	CG4465
pr	CG45782
pr	CG4662
pr	CG4770
pr	CG4825
pr	CG6656
pr	CG8129
pr	CG8419
pr	CG8468
pr	CG9062
pr	CG9150
pr	chp
pr	Cpn
pr	Crg-1
pr	Culd
pr	Cyp4ac1
pr	Cyp4ac2
pr	Cyp4ac3
pr	Dhc98D
pr	Doa
pr	Eaat2
pr	Ekar
pr	FASN3
pr	Fbxl4
pr	fd3F
pr	flw
pr	Galphaq
pr	Gbeta76C
pr	gish
pr	Gp210
pr	Hdc
pr	Hph
pr	inaC
pr	inaD
pr	inaF-C
pr	lqf
pr	Mob2
pr	ninaA
pr	ninaC
pr	ninaD
pr	ninaG
pr	norpA
pr	Obp22a
pr	peb
pr	Pex7
pr	PIP82
pr	Pph13
pr	prom
pr	Prosbeta2R2
pr	Ptpmeg
pr	rdgA
pr	rdgB
pr	rdgC
pr	rtp
pr	seq
pr	shi
pr	SLC5A11
pr	Slik
pr	Sox100B
pr	stops
pr	t
pr	TORIP
pr	trp
pr	trpl
pr	Ttd14
pr	Usp8
pr	Xport-A
pr	Xport-B
glia	Akt1
glia	ana
glia	atl
glia	Cdc42
glia	CG10874
glia	CG12105
glia	CG14050
glia	CG14880
glia	CG14892
glia	CG15449
glia	CG15861
glia	CG16953
glia	CG2145
glia	CG3091
glia	CG31235
glia	CG32032
glia	CG3770
glia	CG42489
glia	CG4409
glia	CG4822
glia	CG5854
glia	CG6723
glia	CG7322
glia	CG7607
glia	CG9426
glia	cpo
glia	Cpr49Ac
glia	Cyp4g15
glia	Dp1
glia	Ets21C
glia	HLH3B
glia	htl
glia	hts
glia	Irk3
glia	Lapsyn
glia	Lsd-1
glia	Mes2
glia	Nep4
glia	nrv2
glia	nuf
glia	Obp44a
glia	Phk-3
glia	repo
glia	rho
glia	RtGEF
glia	Sbf
glia	Spn31A
glia	spok
glia	stumps
glia	Tak1
glia	tal-1A
glia	tal-2A
glia	tal-3A
glia	tal-AA
glia	Tango1
glia	Tsf1
glia	Tsp5D
glia	Usp15-31
glia	ZnT35C
glia	zyd
muscle	al
muscle	bbg
muscle	Blimp-1
muscle	bs
muscle	btn
muscle	cdc14
muscle	CG10602
muscle	CG11241
muscle	CG11275
muscle	CG1136
muscle	CG11409
muscle	CG11966
muscle	CG12896
muscle	CG13003
muscle	CG13026
muscle	CG13856
muscle	CG14132
muscle	CG14304
muscle	CG14964
muscle	CG15605
muscle	CG17843
muscle	CG1806
muscle	CG33978
muscle	CG34323
muscle	CG34459
muscle	CG34461
muscle	CG4115
muscle	CG42390
muscle	CG42822
muscle	CG43050
muscle	CG43057
muscle	CG43163
muscle	CG43394
muscle	CG43710
muscle	CG4613
muscle	CG4998
muscle	CG5687
muscle	CG6967
muscle	CG7378
muscle	CG7402
muscle	CG8086
muscle	CG9572
muscle	CG9592
muscle	chas
muscle	Cnb
muscle	conv
muscle	Cpr47Ef
muscle	Cpr76Bd
muscle	Cyp305a1
muscle	d
muscle	E5
muscle	ect
muscle	Egfr
muscle	form3
muscle	Hil
muscle	Ir94d
muscle	Ir94e
muscle	knrl
muscle	LanB1
muscle	Mrtf
muscle	Notum
muscle	ovo
muscle	pit
muscle	pon
muscle	pot
muscle	ppk17
muscle	SclB
muscle	slbo
muscle	Slc45-1
muscle	Spn88Ea
muscle	TpnC47D
muscle	Ugt36Bb
muscle	Ugt86De
muscle	Vdup1
muscle	wg
muscle	yellow-h
pigment	bw
pigment	CG11977
pigment	CG13077
pigment	CG13511
pigment	CG13840
pigment	CG1561
pigment	CG17572
pigment	CG40485
pigment	CG40486
pigment	CG5909
pigment	CG7365
pigment	CG8925
pigment	CG9717
pigment	fabp
pigment	lz
pigment	Obp19c
pigment	Pdh
pigment	RabX5

## Sheet: TableS5_anatomy_details
Genotype	Figure(s)	Labeling
20XUAS-CsChrimson-mVenus in attP18/ w1118; split-GAL4-AD/+; split-GAL4-DBD/+	1D, S1A (SS00116, SS00090, SS00078)	anti-GFP, anti-Brp
		DPX mounting
		20x objective
		Maximum Intensity projections through entire brain
pJFRC19-13XLexAop2-IVS-myr::GFP in su(Hw)attP8, pJFRC21-10XUAS-IVS-mCD8::RFP in attP3/ w1118 ; split-GAL4-AD/+; split-GAL4-DBD/ UAS unc84 2xGFP	1D, S1A, S2A (ninaEfl-GAL4, SS55442, SS55437, SS55438, SS08909, SS55440, SS55439, SS55441)	anti-dsRed (recognizes RFP), anti-GFP (not shown), anti-CadN
		Slowfade mounting
		Maximum Intensity projections through entire brain (1D, S1A) (20x objective)
		Single confocal sections (S2A) (40x objective)
Published images from Aso et al 2015; image stacks downloaded from https://www.janelia.org/split-GAL4	1D (MB312B, MB419B)	see Aso et al 2015
		Maximum Intensity projections through entire brain
w1118; split-GAL4-AD/+; split-GAL4-DBD/pJFRC51-3XUAS-IVS-Syt::smHA in su(Hw)attP1, pJFRC225-5XUAS-IVS-myr::smFLAG in VK00005	1D, S1A, S1C, C’, S2A, S2B (all images except lines mentioned above and single cell images)	anti-FLAG, anti-HA (not shown), anti-Brp
		DPX mounting
		resampled views generated with Vaa3D ( 63x objective)
		Maximum Intensity projections through entire brain (20x objective)
w1118 ; split-GAL4-AD/+; split-GAL4-DBD/ UAS unc84 2xGFP in attP2	2A	anti-GFP, anti-Brp
		Slowfade mounting
		20x objective
		Maximum Intensity projections through entire brain
pBPhsFlp2::PEST in attP3/w1118; split-GAL4-AD/+; split-GAL4-DBD/ pJFRC201-10XUAS-FRT>STOP>FRT-myr::smGFP-HA in VK0005, pJFRC240-10X-UAS-FRT>STOP>FRT-myr::smGFP-V5-THS-10XUAS-FRT>STOP>FRT-myr::smGFP-FLAG in su(Hw)attP1	S2B (SS03656, SS00307, SS00308, SS02594)	anti-HA,anti-V5, anti-FLAG, anti-Brp
		DPX mounting
		63x objective
		resampled views generated with Vaa3D
R57C10-Flp2::PEST in in attP18/ w1118; split-GAL4-AD/+; split-GAL4-DBD/ pJFRC210-10XUAS-FRT>STOP>FRT-myr::smGFP-OLLAS in attP2, pJFRC201-10XUAS-FRT>STOP>FRT-myr::smGFP-HA in VK0005, pJFRC240-10X-UAS-FRT>STOP>FRT-myr::smGFP-V5-THS-10XUAS-FRT>STOP>FRT-myr::smGFP-FLAG in su(Hw)attP1	S2B (SS00321, SS00327)	anti-HA,anti-V5, anti-FLAG, anti-Brp
		DPX mounting
		63x objective
		resampled views generated with Vaa3D
pJFRC19-13XLexAop2-IVS-myr::GFP in su(Hw)attP8, pJFRC21-10XUAS-IVS-mCD8::RFP in attP3/ w1118; split-GAL4-AD / PBac{fkh-GFP.FPTB}VK00037 ; split-GAL4-DBD /+	3K, S4H	anti-dsRed (recognizes RFP), anti-GFP
		Slowfade mounting
		40x or 63x objective
		Single confocal sections
pJFRC19-13XLexAop2-IVS-myr::GFP in su(Hw)attP8, pJFRC21-10XUAS-IVS-mCD8::RFP in attP3/ w1118; split-GAL4-AD / PBac{Ets65A-GFP.FLAG}VK00037; split-GAL4-DBD /+	S4I	anti-dsRed (recognizes RFP), anti-GFP
		Slowfade mounting (DPX for C2 and C3 panels)
		63x objective
		Single confocal sections
pJFRC19-13XLexAop2-IVS-myr::GFP in su(Hw)attP8, pJFRC21-10XUAS-IVS-mCD8::RFP in attP3/ w1118; split-GAL4-AD / Mi{PT-GFSTF.0}TfAP-2MI04611-GFSTF.0; split-GAL4-DBD /+	4F,G	Native fluorescence (GFP, RFP)
		Slowfade mounting
		40x objective
		Single confocal sections
y1 w*; Mi{PT-GFSTF.1}klgMI02135-GFSTF.1/TM6C, Sb[1] Tb[1]	4I	anti-GFP, anti-CadN
		Slowfade mounting
		40x objective
		Single confocal sections
pJFRC19-13XLexAop2-IVS-myr::GFP in su(Hw)attP8, pJFRC21-10XUAS-IVS-mCD8::RFP in attP3/ w1118; split-GAL4-AD / Mi{PT-GFSTF.0} VmatMI07680-GFSTF.0; split-GAL4-DBD /+	5F	anti-dsRed (recognizes RFP), anti-GFP
		Slowfade mounting
		40x objective
		Single confocal section
pJFRC19-13XLexAop2-IVS-myr::GFP in su(Hw)attP8, pJFRC21-10XUAS-IVS-mCD8::RFP in attP3/ w1118; split-GAL4-AD / Mi{PT-GFSTF.0}NosMI09718-GFSTF.0; split-GAL4-DBD /+	5G	anti-dsRed (recognizes RFP), anti-GFP
		Slowfade mounting
		40x objective
		Single confocal sections
w1118; PBac{y[+mDint2] w[+mC]=Ets65A-GFP.FLAG}VK00037	5H	anti-AstA (shown), anti-GFP (not shown)
		Slowfade mounting
		40x objective
		Single confocal section
y1 w* / w1118;; Mi{Trojan-GAL4.1}OambMI12417-TG4.1/ pJFRC12-10XUAS-IVS-myr::GFP in attP2	6B	anti-GFP, anti-repo
		Slowfade mounting
		40x objective
		Single confocal section
y1 w*; Mi{PT-GFSTF.2}GluClalphaMI02890-GFSTF.2/TM6C, Sb[1] Tb[1]	6C	anti-GFP, anti-repo
		Slowfade mounting
		40x objective
		Single confocal section
pJFRC19-13XLexAop2-IVS-myr::GFP in su(Hw)attP8, pJFRC21-10XUAS-IVS-mCD8::RFP in attP3/ w1118; R47G08-LexAp65 in attP40 (Dm12)/ Lim3-GAL4 MI03817- Trojan-GAL4.1	S6C	Native fluorescence (GFP, RFP)
		Slowfade mounting
		40x objective
		Single confocal section
pJFRC19-13XLexAop2-IVS-myr::GFP in su(Hw)attP8, pJFRC21-10XUAS-IVS-mCD8::RFP in attP3/ w1118; R65H03-LexAp65 in attP40 / Lim3-GAL4 MI03817- Trojan-GAL4.1	S6D	Native fluorescence (GFP, RFP)
		Slowfade mounting
		40x objective
		Single confocal section
w* P{y[+t7.7] w[+mC]=sens-FLPG5.C}attP18/ w1118; +/CyO; sensLy-1/ TI{TI}VAChTFRT-STOP-FRT.HA	7A	anti-HA, native fluorescence (RFP in photoreceptors; present in sens-FLP clones due to perdurance)
		Slowfade mounting
		63x objective
		Maximum Intensity projections through part of a confocal stack

## Sheet: TableS6_TAPINseq_buffers
Homogenization buffer:
Prepare a 500 – 1000ml stock of the following base buffer and store at 4°C.
mSodium acetate ph8.5
2.5mM MgCl2
250mM Sucrose
Add the following components to complete the homogenization buffer just before use (5mls/isolation).
Component	Stock	Amount to add to	Final
	concentration	5mls buffer	concentration
NP40	0.1	250ul	0.005
anti-GFP antibody	0.2mg/ml	10ul	0.4ug/ml
spermidine	1M	3ul	0.6mM
spermine	1M	1ul	0.2mM
DTT	1M	5ul	1mM
Protease inhibitor	Dissolve 1 tab in 1ml H2O	100ul	1X
Torula RNA	10mg/ml	250ul	0.5mg/ml
Carboxyl beads	30mg/ml	100ul	0.6mg/ml
Binding buffer:
Prepare a 500 – 1000ml stock of the following base buffer and store at 4°C.
500mM Sodium acetate ph8.5
250mM Sucrose
6mM EGTA
6mM EDTA
Add the following components to complete the binding buffer just before use (5mls/isolation).
Component	Stock	Amount to add to	Final
	concentration	5mls buffer	concentration
spermidine	1M	3ul	0.6mM
spermine	1M	1ul	0.2mM
DTT	1M	5ul	1mM
Protease inhibitor	Dissolve 1 tab in 1ml H2O	100ul	1X
Torula RNA	10mg/ml	125ul	0.25mg/ml
Protein A beads	30mg/ml	30ul	0.18mg/ml
Wash buffer:
Prepare a 500 – 1000ml stock of the following base buffer and store at 4°C.
250mM Sodium acetate ph8.5
250mM Sucrose
Add the following components to complete the binding buffer just before use (10mls/isolation).
Component	Stock	Amount to add to	Final
	concentration	10mls buffer	concentration
NP40	0.1	500ul	0.005
Release buffer:
Prepare 10mls of a 10X stock of the base buffer and store at 4 degrees C.
100mM Tris pH7.5
25mM MgCl2
5mM CaCl2
2.5mM Sucrose
Prepare 1ml of 1X Release buffer for both the trituration and post-release wash steps for each sample.
Component	Stock	Amount to add to	Final
	concentration	10mls buffer	concentration
Release buffer	10X	100ul	1X
NP40	0.1	50ul	0.005
H2O		850ul
Just before use prepare the following 50ul reaction mix for a single bead release.
Component	Amount to add
10X Release buffer	5ul
H2O	31.5ul
RNAsin	1ul
Torula RNA	5ul
DNAseI	1ul
IdeZ protease	4ul
10% NP40	2.5ul
