# Supplementary figures and images for: A genetic, genomic, and computational resource for exploring neural circuit function
Source: eLife journal article supplement (doi:10.7554/elife.50901), 2020-01-15

FIGURE 5 - Supplemental 3

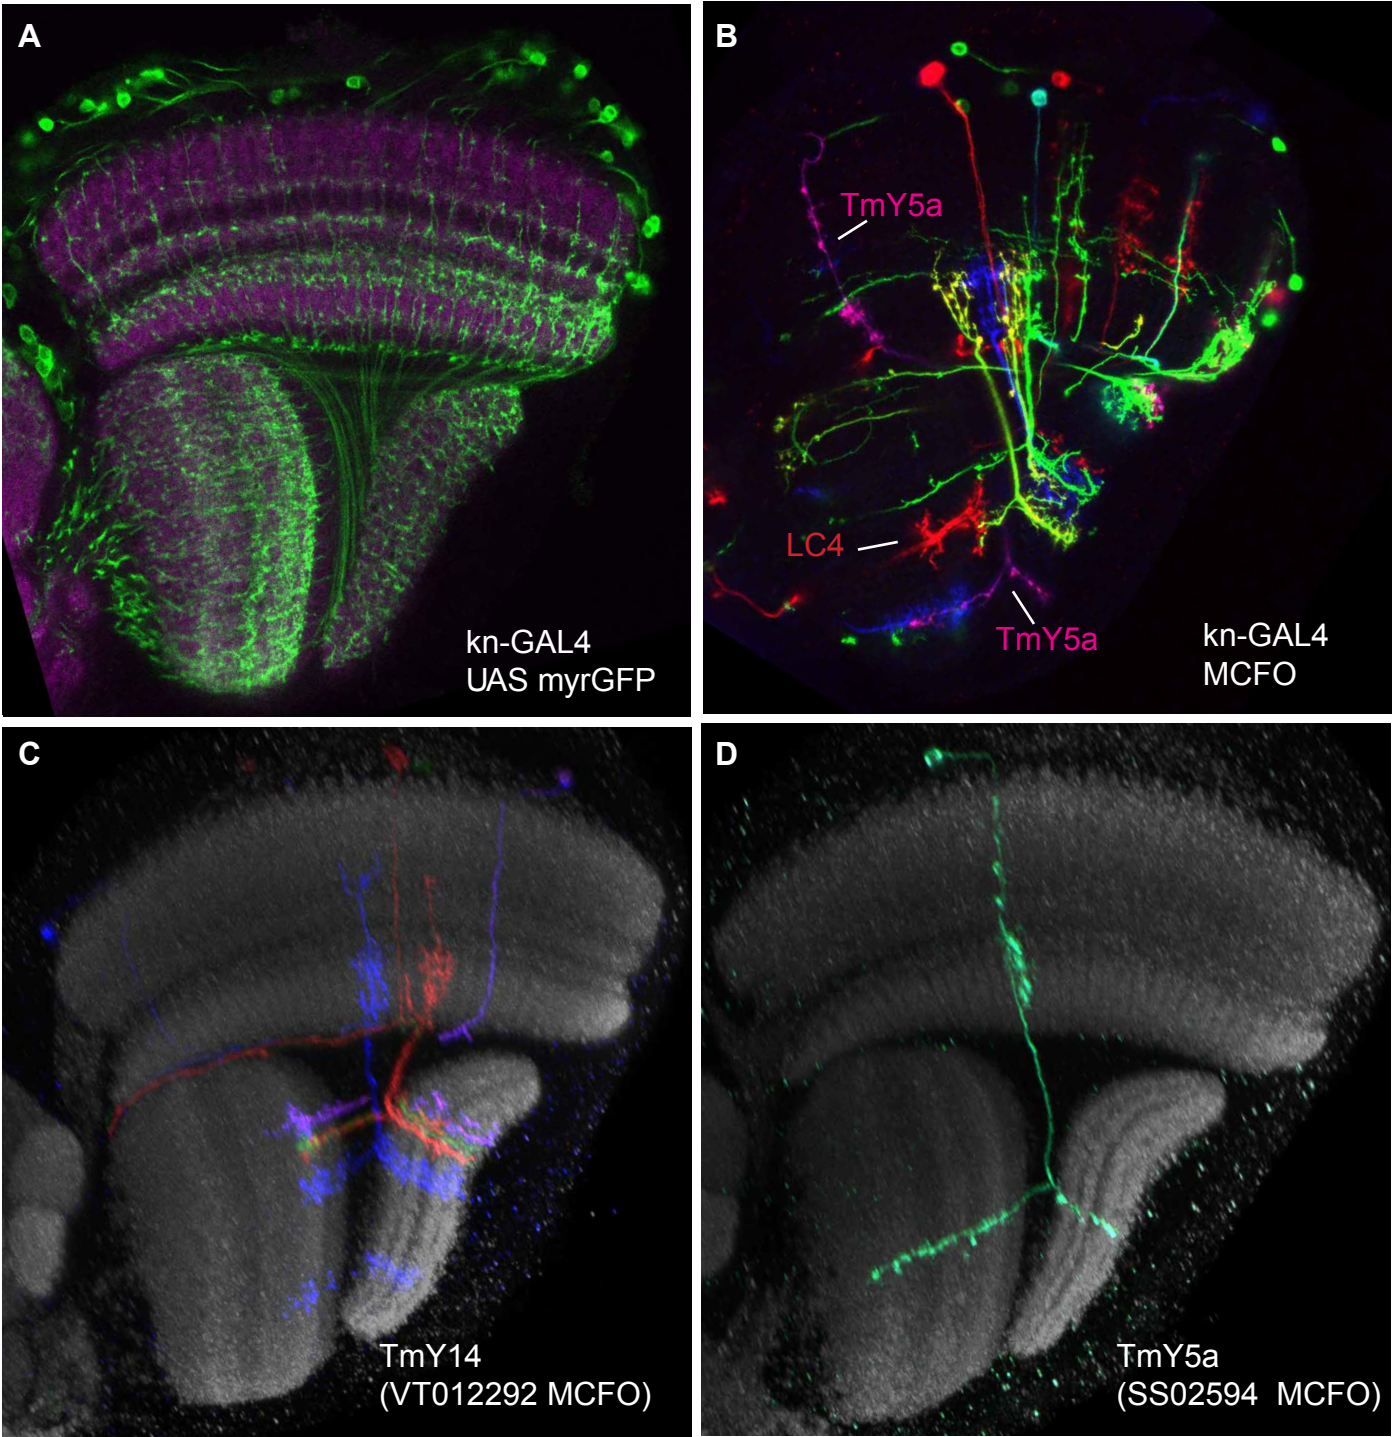

Supplement: supp [file elife-50901-supp-v1.zip]

FIGURE 7 - Supplemental 1

A. Motion detection pathway

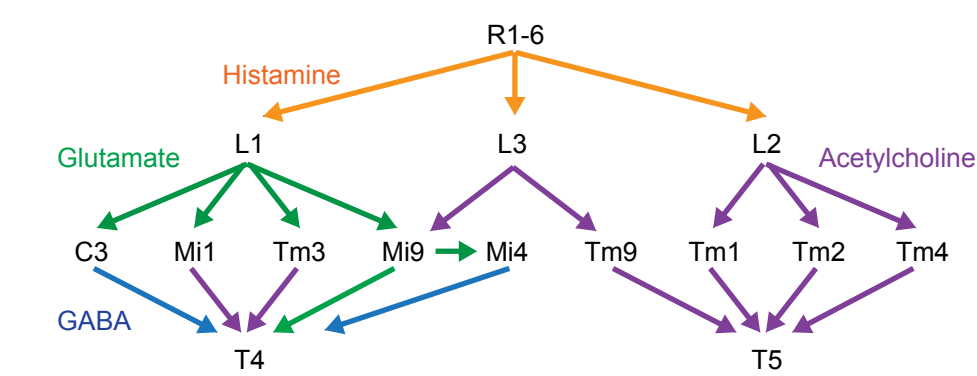

B.

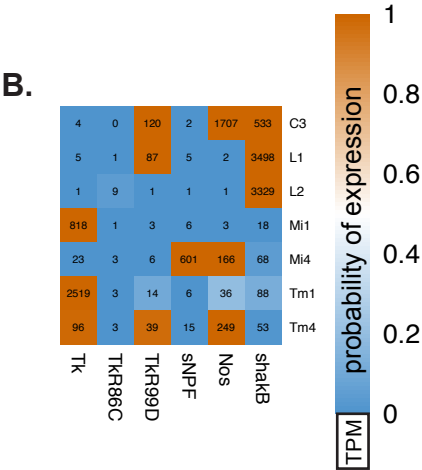

Supplement: supp [file elife-50901-supp-v1.zip]

FIGURE 3 - Supplemental 2

A

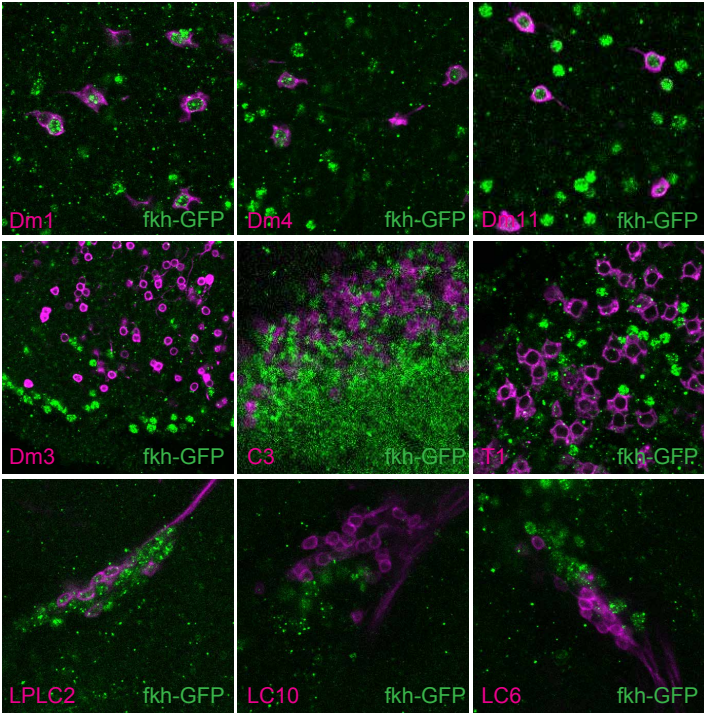

B

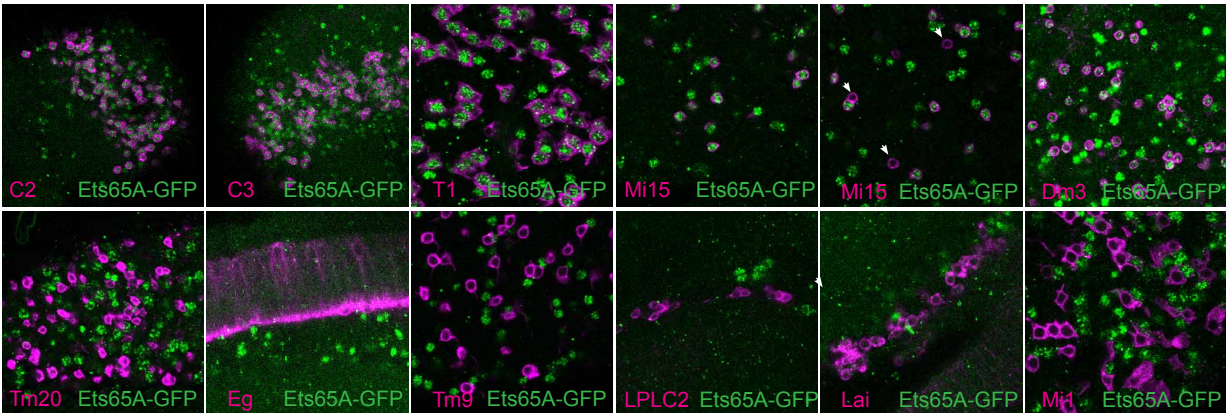

Supplement: supp [file elife-50901-supp-v1.zip]

FIGURE 1 - Supplemental 2

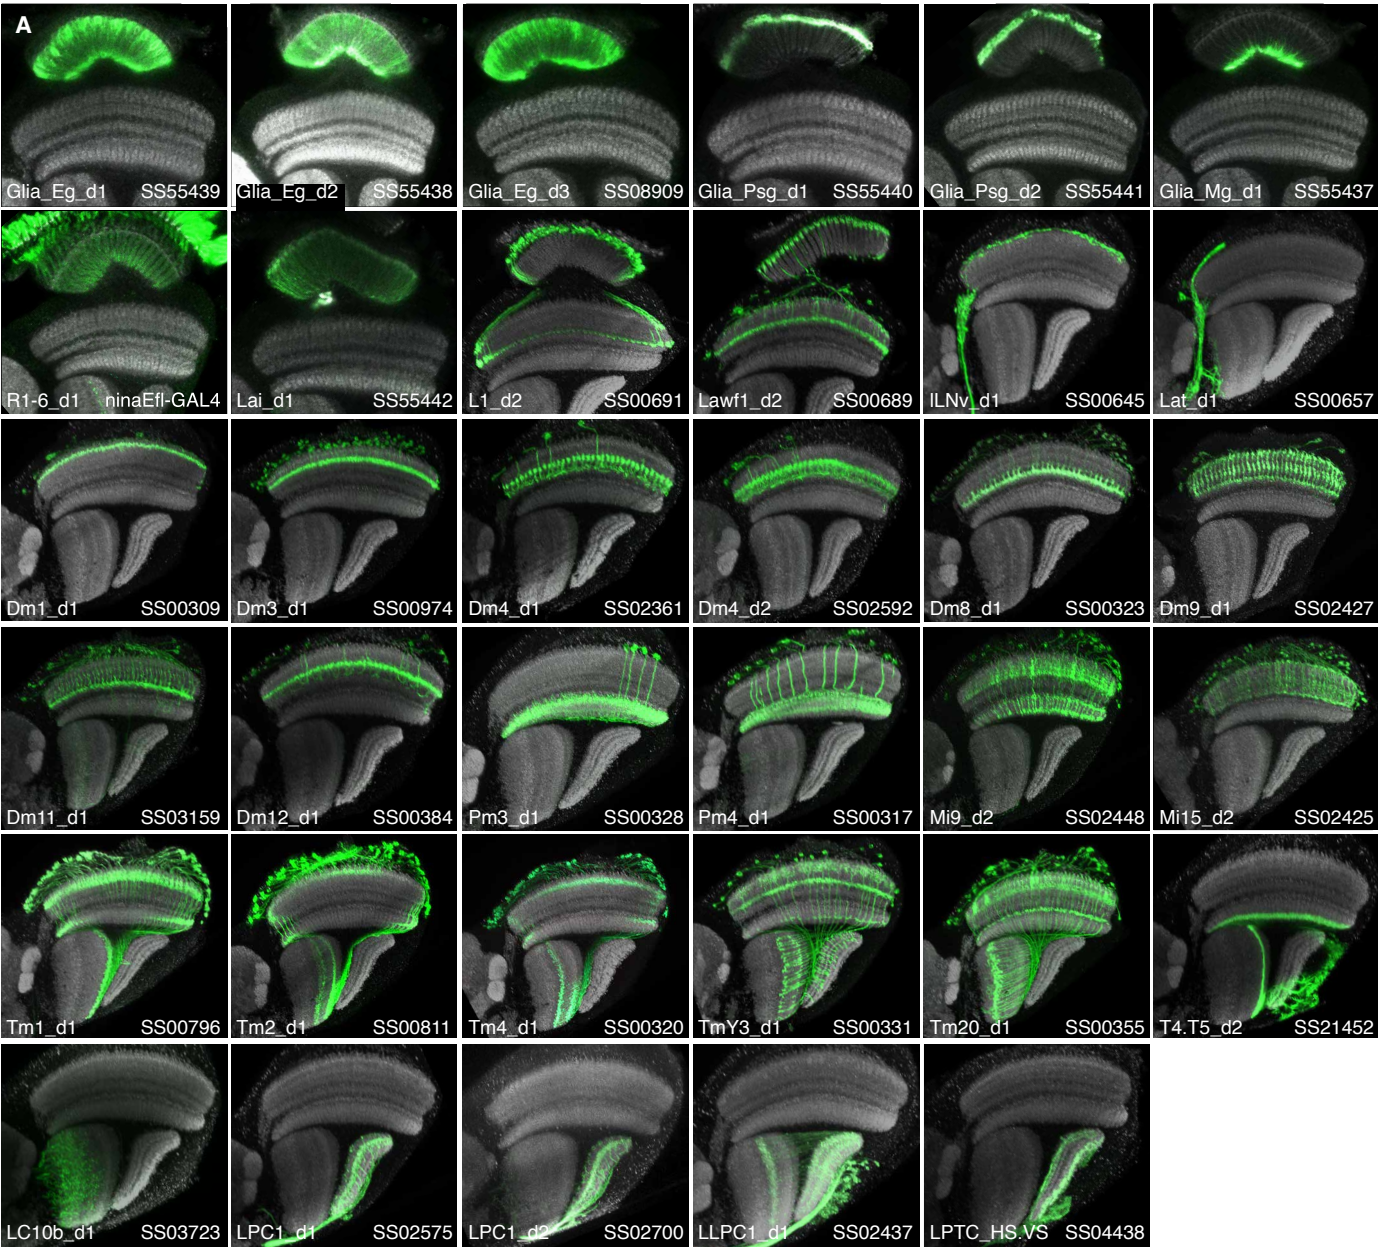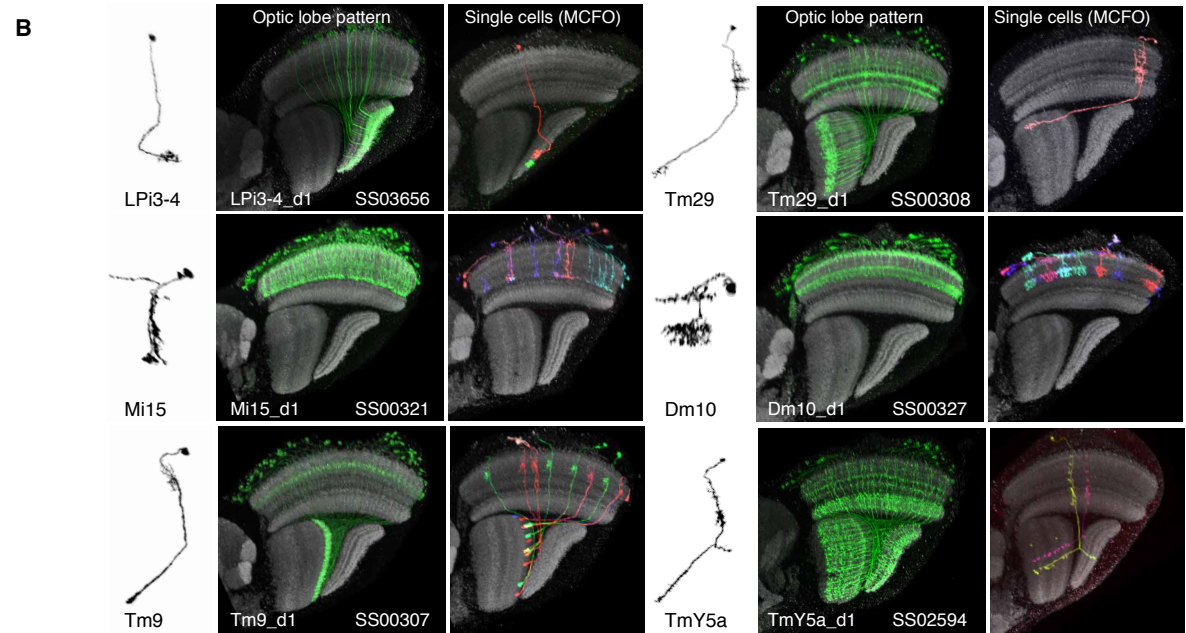

Supplement: supp [file elife-50901-supp-v1.zip]

**FIGURE 1 - Supplemental 1**

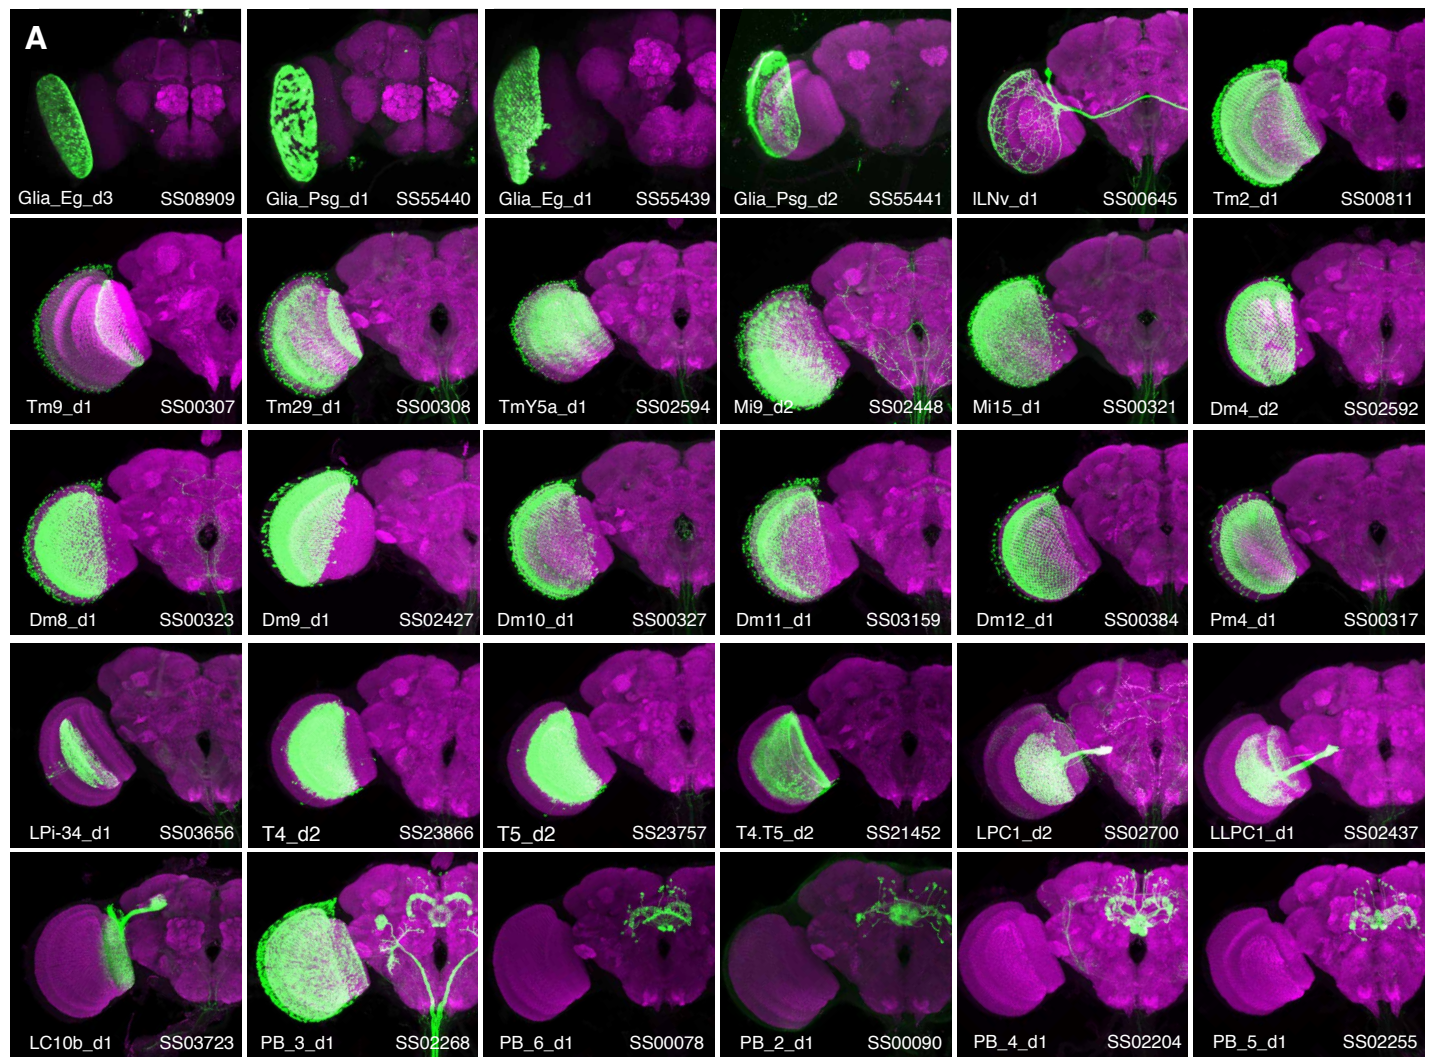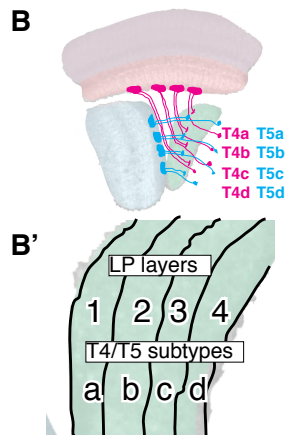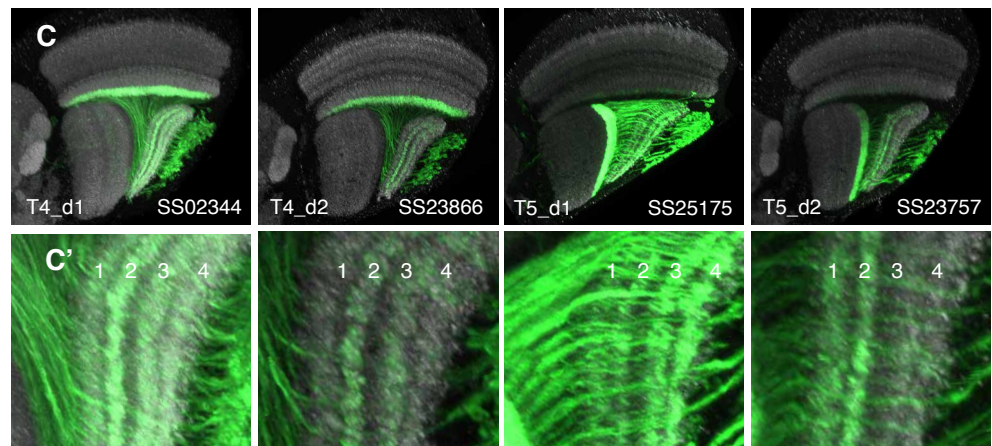

Supplement: supp [file elife-50901-supp-v1.zip]

**FIGURE 2 - Supplemental 1**

**A. INTACT-seq**

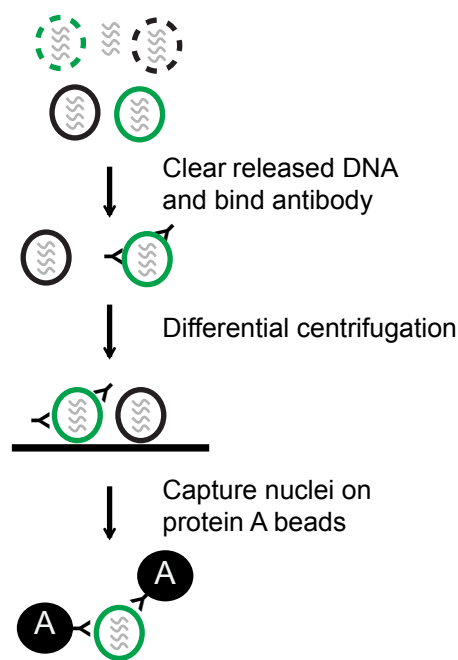

**B. TAPIN-seq**

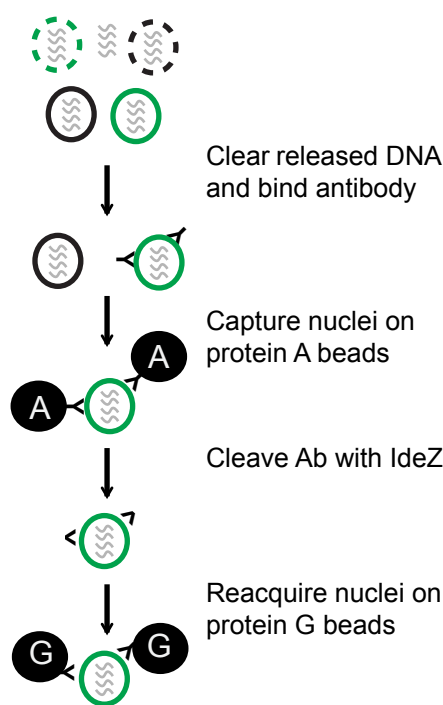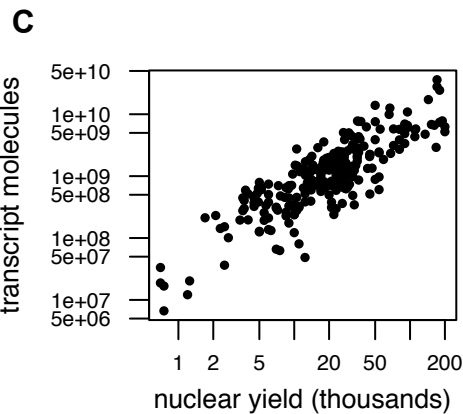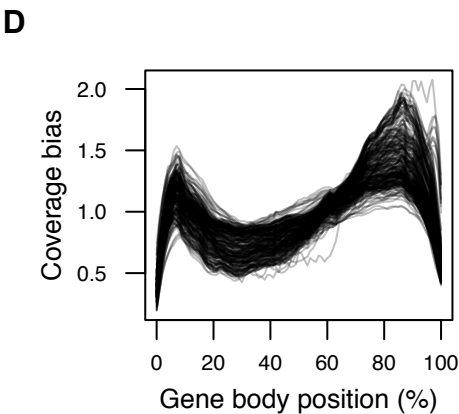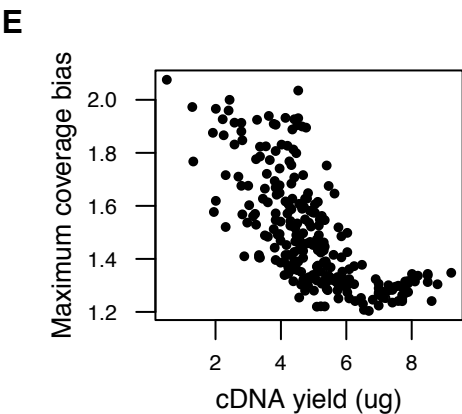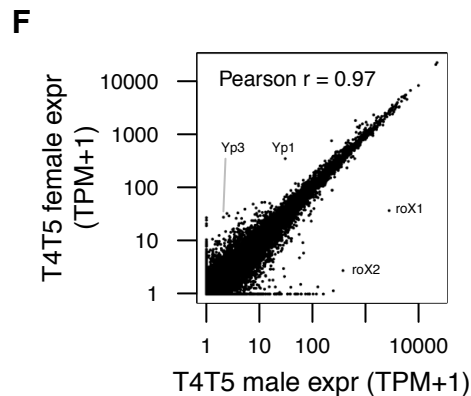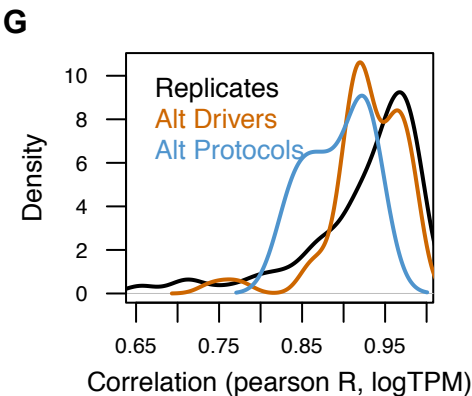

Supplement: supp [file elife-50901-supp-v1.zip]

**FIGURE 3 - Supplemental 1**

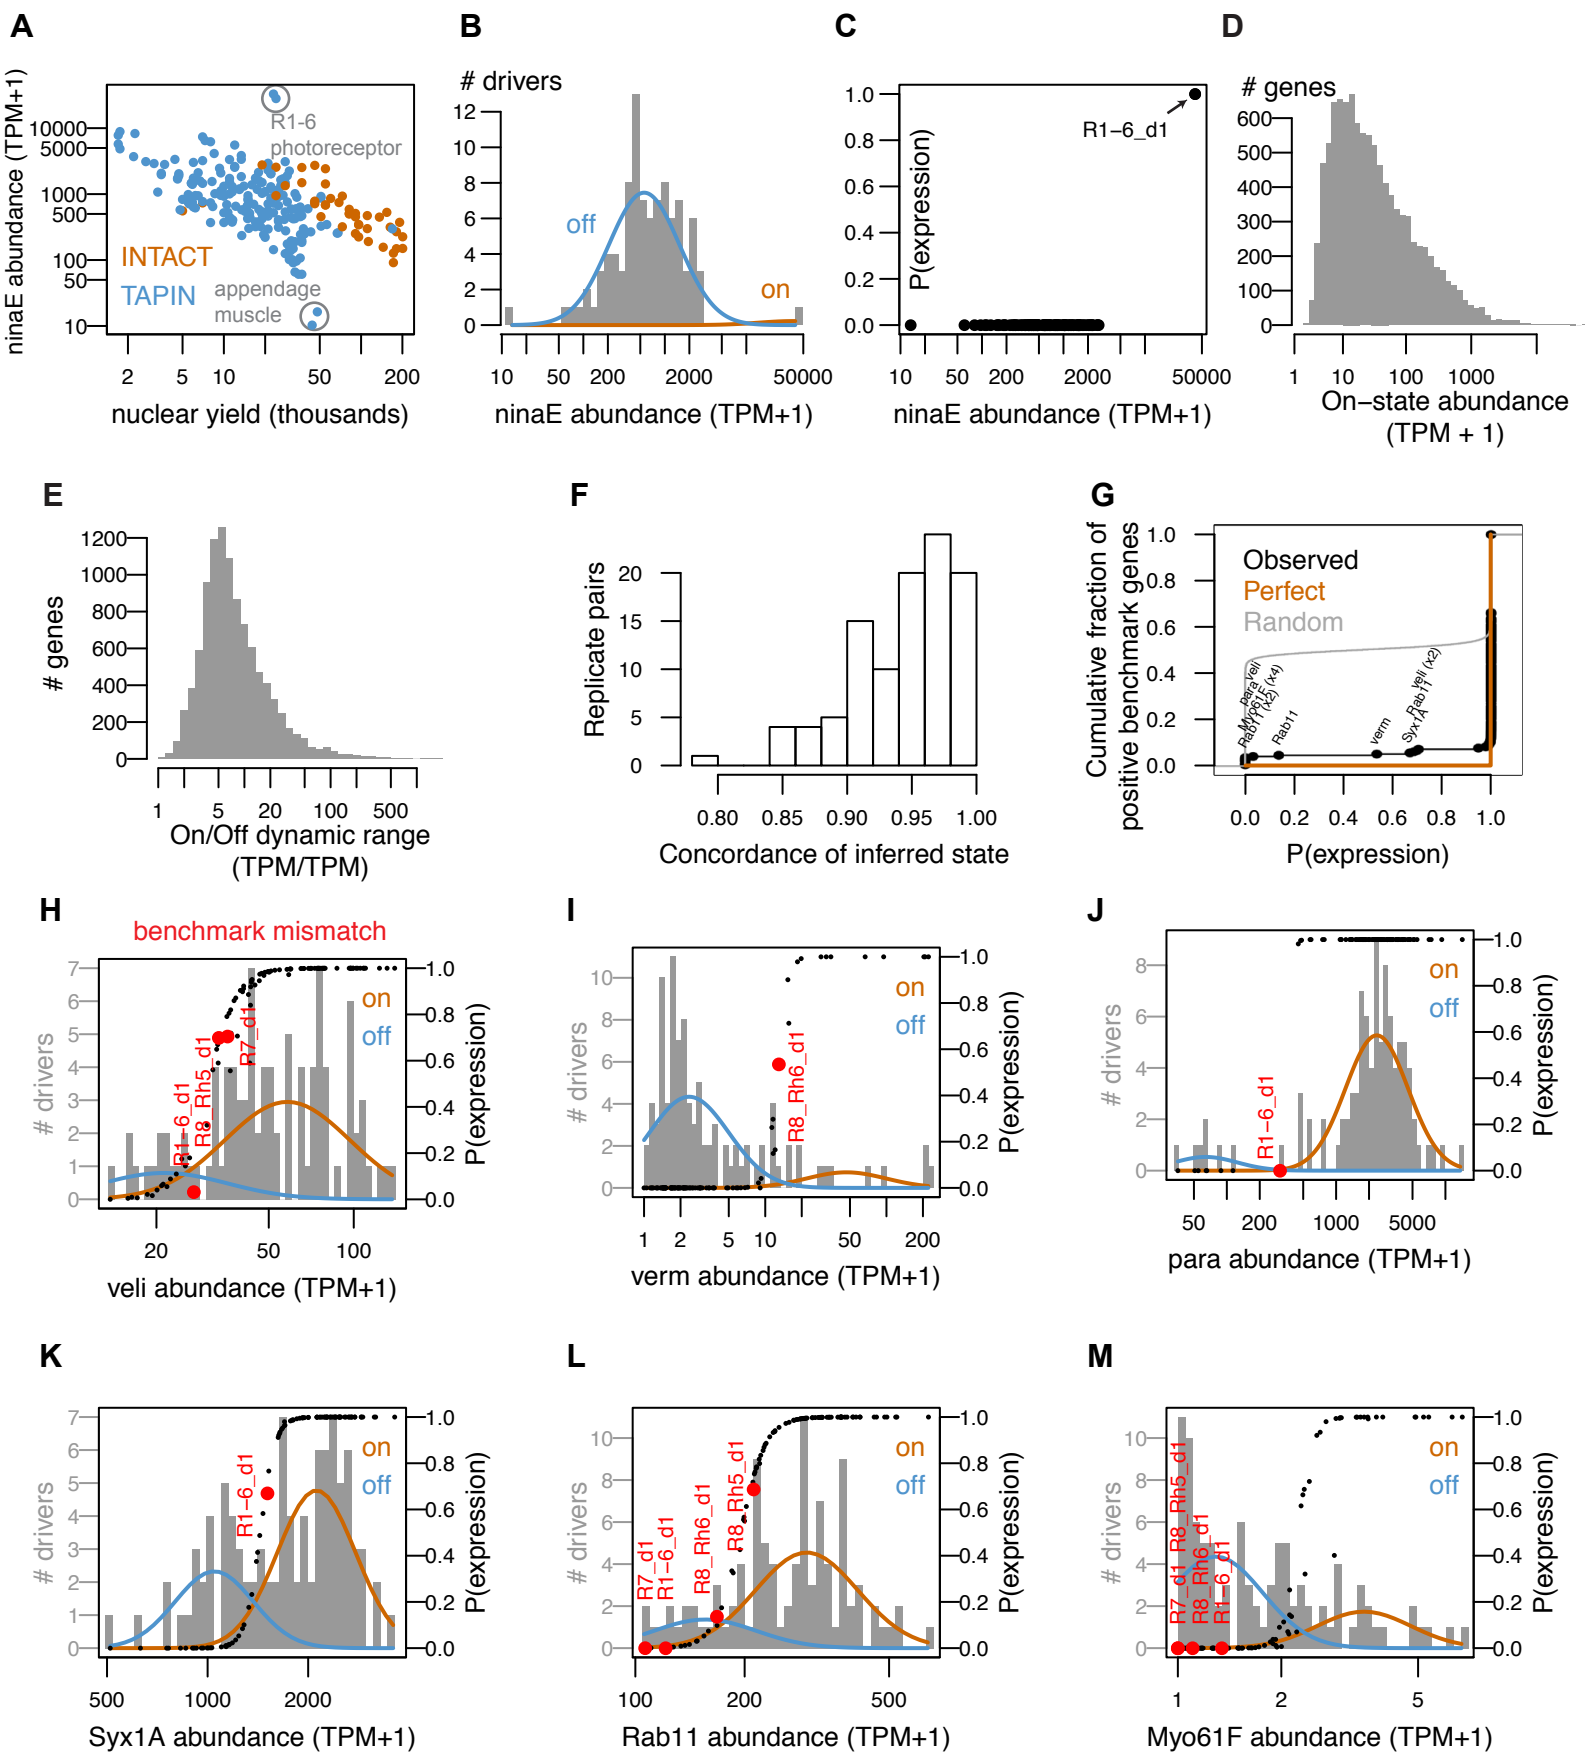

Supplement: supp [file elife-50901-supp-v1.zip]
